# Supplementary material
Source: publisher figshare collection journal article supplement (https://acs.figshare.com/ndownloader/files/4468150)
Supplement: Supplementary file 1 [file 4468150]

# Synthesis, Structural Investigations, Hydrogen-Deuterium Exchange Studies and Molecular Modeling of Conformationally Stabilized Aromatic Oligoamides

Yan Yan,<sup>†</sup> Bo Qin,<sup>†</sup> Changliang Ren,<sup>†</sup> Xiuying Chen,<sup>‡</sup> Yeow Kwan Yip,<sup>†</sup> Ruijuan Ye,<sup>†</sup>  
Dawei Zhang,<sup>§</sup> Haibin Su,<sup>‡</sup> and Huaqiang Zeng<sup>\*,†</sup>

*Department of Chemistry and MedChem Programme, National University of Singapore, 3 Science Drive 3, Singapore, 117543, Department of Materials Science, Nanyang Technological University, 50 Nanyang Avenue, Singapore, 639798, Department of Chemistry & Biological Chemistry, Nanyang Technological University, 21 Nanyang Link, Singapore, 637371*

Email: chmzh@nus.edu.sg

## Supporting Information

### Table of Content

|                                                        |     |
|--------------------------------------------------------|-----|
| 1. Synthetic Procedures/Characterizations .....        | S2  |
| 2. Amide Hydrogen-Deuterium Exchange Experiments ..... | S17 |
| 3. <i>Ab initio</i> Calculation .....                  | S19 |
| 4. Determination of Crystal Structures .....           | S19 |
| 5. Crystal Data and Structure Refinement .....         | S20 |

## Synthetic Procedures/Characterizations

All the reagents were obtained from commercial suppliers and used as received unless otherwise noted. Aqueous solutions were prepared from distilled water. The organic solutions from all liquid extractions were dried over anhydrous  $\text{Na}_2\text{SO}_4$  for a minimum of 15 minutes before filtration. Reactions were monitored by thin-layer chromatography (TLC) on silica gel pre-coated glass plate (0.225 mm thickness, 60F-254, E. Merck). Flash column chromatography was performed using pre-coated 0.2 mm silica plates from Selecto Scientific. Chemical yields refer to pure isolated substances.  $^1\text{H}$  and  $^{13}\text{C}$  NMR spectra were recorded on either a Bruker ACF-300 or AVF-500 spectrometer. In addition, key compounds were characterized by 2D NOSEY and/or X-ray Diffraction.  $^1\text{H}$  NMR spectra were recorded on Bruker ACF300 (300 MHz) and ACF500 spectrometers (500 MHz). The solvent signal of  $\text{CDCl}_3$  was referenced at  $\delta = 7.26$ , and  $\text{DMSO}-d_6$  at 2.50. Coupling constants ( $J$  values) are reported in Hertz (Hz).  $^1\text{H}$  NMR data are recorded in the order: chemical shift value, multiplicity (s, singlet; d, doublet; t, triplet; q, quartet; m, multiplet; br, broad), number of protons that gave rise to the signal and coupling constant, where applicable.  $^{13}\text{C}$  Spectra are proton-decoupled and recorded on Bruker ACF300 (300 MHz) and ACF500 spectrometers (500 MHz). The solvent,  $\text{CDCl}_3$  was referenced at  $\delta = 77$  ppm and  $\text{DMSO}-d_6$  at 39.5 ppm.  $\text{CDCl}_3$  (99.8% deuterated) was purchased from Aldrich and used without further purification.

**Compound 1a:** 2,5-dihydroxybenzoic acid (4.62 g, 30.0 mmol) was dissolved in MeOH (60 mL), to which concentrated  $\text{H}_2\text{SO}_4$  (5 mL) was added. The mixture was heated under reflux for 48 hrs. The solvent was then removed *in vacuo* and the residue was dissolved in  $\text{CH}_2\text{Cl}_2$  (100 mL), washed with water (2 x 50 mL) and dried over anhydrous  $\text{Na}_2\text{SO}_4$ . Removal of  $\text{CH}_2\text{Cl}_2$  gave the pure product **1a** as a light brown solid. Yield: 4.89 g, 97%.  $^1\text{H}$  NMR (300 MHz,  $\text{CDCl}_3$ )  $\delta$  10.33 (s, 1H), 7.28 (d, 1H,  $J = 3.1$ ), 7.01 (d, 1H,  $J = 8.9$ ), 6.88 (d, 1H,  $J = 8.9$ ), 4.76 (s, 1H), 3.93 (s, 3H).  $^{13}\text{C}$  NMR (75 MHz,  $\text{CDCl}_3$ )  $\delta$  170.89, 156.12, 148.52, 124.85, 119.09, 115.55, 112.87, 53.08. HRMS-ESI: calculated for  $[\text{M}]^+$  ( $\text{C}_8\text{H}_8\text{O}_4$ ):  $m/z$  167.0344 found:  $m/z$  167.0343.

**Compound 1b:** **1a** (1.34 g, 8.00 mmol) was dissolved in anhydrous acetone (30 mL), to which anhydrous  $\text{K}_2\text{CO}_3$  (2.00 g, 14.5 mmol) and iodomethane (0.50 mL, 8.00 mmol) was added. The mixture was heated under reflux for 48 hrs. The reaction mixture was then filtered and the solvent was removed *in vacuo*. The concentrate was dissolved in  $\text{CH}_2\text{Cl}_2$  (100 mL), washed with water (2 x 50 mL) and dried over anhydrous  $\text{Na}_2\text{SO}_4$ . Removal of  $\text{CH}_2\text{Cl}_2$  gave the crude product, which was purified by flash column chromatography (silica gel) using hexane/ethyl acetate (4:1 v/v) as the eluent to give pure product **1b** as a yellow liquid. Yield: 0.95 g, 65%.  $^1\text{H}$  NMR (300 MHz,  $\text{CDCl}_3$ )  $\delta$  10.33 (s, 1H), 7.07 (d, 1H,  $J = 3.2$ ), 7.04 (d, 1H,  $J = 3.2$ ), 6.90 (d, 1H,  $J = 5.9$ ), 3.92 (s, 3H), 3.75 (s, 3H).  $^{13}\text{C}$  NMR (75 MHz,  $\text{CDCl}_3$ )  $\delta$  170.60, 156.41, 152.35, 124.21, 118.74, 112.12, 60.64, 55.94, 52.50. HRMS-ESI: calculated for  $[\text{M}]^+$  ( $\text{C}_9\text{H}_{10}\text{O}_4$ ):  $m/z$  181.0579 found:  $m/z$  181.0579.

**Compound 1c:** **1a** (1.34 g, 8.00 mmol) was dissolved in anhydrous acetone (30 mL), to which anhydrous  $\text{K}_2\text{CO}_3$  (2.00 g, 14.5 mmol) and 1-bromooctane (1.38 mL, 8.00 mmol) was added. The mixture was heated under reflux for 48 hrs. The reaction mixture was then filtered and the solvent was removed *in vacuo*. The concentrate was dissolved in  $\text{CH}_2\text{Cl}_2$  (40 mL), washed with water (2 x 30 mL) and dried over anhydrous  $\text{Na}_2\text{SO}_4$ . Removal of  $\text{CH}_2\text{Cl}_2$  gave the crude product, which was recrystallized from MeOH to give pure product **1c** as a light yellow solid. Yield: 1.57 g, 70%.  $^1\text{H}$  NMR (300 MHz,  $\text{CDCl}_3$ )  $\delta$  10.35 (s, 1H), 7.29 (d,

1H,  $J = 3.1$ ), 7.08 (d, 1H,  $J = 9.0$ ), 6.90 (d, 1H,  $J = 9.0$ ), 3.95 (s, 3H), 3.88 (m, 2H), 1.76 (m, 2H), 1.42 (m, 2H), 1.25 (m, 8H), 0.89 (m, 3H).  $^{13}\text{C}$  NMR (75 MHz,  $\text{CDCl}_3$ )  $\delta$  171.02, 156.63, 152.24, 125.25, 119.10, 113.57, 112.53, 69.51, 52.92, 32.49, 30.03, 29.97, 29.91, 26.71, 23.33, 14.76. HRMS-EI: calculated for  $[\text{M}]^+$  ( $\text{C}_{16}\text{H}_{24}\text{O}_4$ ):  $m/z$  280.1675 found:  $m/z$  280.1677.

**Compound 1d: 1a** (1.34 g, 8.00 mmol) was dissolved in anhydrous acetone (30 mL), to which anhydrous  $\text{K}_2\text{CO}_3$  (2.00 g, 14.5 mmol) and 2-bromopropane (3.80 mL, 8.00 mmol) was added. The mixture was heated under reflux for 48 hrs. The reaction mixture was then filtered and the solvent was removed in *vacuo*. The concentrate was dissolved in  $\text{CH}_2\text{Cl}_2$  (40 mL), washed with water (2 x 50 mL) and dried over anhydrous  $\text{Na}_2\text{SO}_4$ . Removal of  $\text{CH}_2\text{Cl}_2$  gave the crude product, which was purified by flash column chromatography (silica gel) using hexane/ethyl acetate (4:1 v/v) as the eluent to give pure product **1d** as a yellow liquid. Yield: 0.86 g, 51%.  $^1\text{H}$  NMR (300 MHz,  $\text{CDCl}_3$ )  $\delta$  10.33 (s, 1H), 7.28 (d, 1H,  $J = 3.1$ ), 7.02 (d, 1H,  $J = 5.3$ ), 6.86 (d, 1H,  $J = 5.3$ ), 4.38 (m, 1H), 3.89 (s, 3H) 1.31 (s, 6H).  $^{13}\text{C}$  NMR (75 MHz,  $\text{CDCl}_3$ )  $\delta$  170.86, 156.66, 150.67, 126.71, 118.94, 116.18, 112.59, 71.82, 52.79, 22.51. HRMS-EI: calculated for  $[\text{M}]^+$  ( $\text{C}_{11}\text{H}_{14}\text{O}_4$ ):  $m/z$  210.0892 found:  $m/z$  210.0893.

**Compound 1e: 1b** (0.18 g, 1.00 mmol) and Montmorillonite K10 (0.50 g) were added to a suspension of bismuth nitrate (0.39 g, 1.00 mmol) in THF (10 mL). The mixture was stirred at room temperature for 1 h and solid was filtered. Solvent was then removed in *vacuo* and the residue was dissolved in  $\text{CH}_2\text{Cl}_2$ . The filtrate was washed with 1M HCl (1 x 50 mL), water (2 x 50 mL) and dried over anhydrous  $\text{Na}_2\text{SO}_4$ . Removal of  $\text{CH}_2\text{Cl}_2$  gave the pure product **1e** as a yellow solid. Yield: 0.14 g, 63%.  $^1\text{H}$  NMR (300 MHz,  $\text{CDCl}_3$ )  $\delta$  11.46 (s, 1H), 7.72 (d, 1H,  $J = 7.9$ ), 7.70 (d, 1H,  $J = 7.9$ ), 4.01 (s, 3H), 3.84 (s, 3H).  $^{13}\text{C}$  NMR (75 MHz,  $\text{CDCl}_3$ )  $\delta$  169.28, 151.37, 150.51, 138.27, 122.42, 117.12, 68.61, 56.95, 53.82. HRMS-ESI: calculated for  $[\text{M}]^-$  ( $\text{C}_9\text{H}_9\text{NO}_6$ ):  $m/z$  226.0352 found:  $m/z$  226.0364.

**Compound 1f: 1c** (0.28 g, 1.00 mmol) and Montmorillonite K10 (0.50 g) were added to a suspension of bismuth nitrate (0.39 g, 1.00 mmol) in THF (10 mL). The mixture was stirred at room temperature for 1 h and solid was filtered. Solvent was then removed in *vacuo* and the residue was dissolved in  $\text{CH}_2\text{Cl}_2$ . The filtrate was washed with 1M HCl (1 x 50 mL), water (2 x 50 mL) and dried over anhydrous  $\text{Na}_2\text{SO}_4$ . Removal of  $\text{CH}_2\text{Cl}_2$  gave the crude product, which was recrystallized from MeOH to give pure product **1f** as a yellow solid. Yield: 0.19 g, 58%.  $^1\text{H}$  NMR (300 MHz,  $\text{CDCl}_3$ )  $\delta$  11.44 (s, 1H), 7.72 (d, 1H,  $J = 3.3$ ), 7.69 (d, 1H,  $J = 3.1$ ), 4.00 (s, 3H), 3.96 (m, 2H), 1.79 (m, 2H), 1.31 (m, 2H), 1.29 (m, 8H), 0.89 (m, 3H).  $^{13}\text{C}$  NMR (75 MHz,  $\text{CDCl}_3$ )  $\delta$  169.30, 150.90, 150.33, 138.19, 122.97, 117.68, 116.85, 69.95, 53.73, 32.40, 29.88, 29.81, 29.64, 26.52, 23.26, 14.68. HRMS-ESI: calculated for  $[\text{M}]^+$  ( $\text{C}_{16}\text{H}_{23}\text{NO}_6$ ):  $m/z$  324.1447 found:  $m/z$  324.1461.

**Compound 1g: 1d** (0.21 g, 1.00 mmol) and Montmorillonite K10 (0.50 g) were added to a suspension of bismuth nitrate (0.39 g, 1.00 mmol) in THF (10 mL). The mixture was stirred at room temperature for 1 h and solid was filtered. Solvent was then removed in *vacuo* and the residue was dissolved in  $\text{CH}_2\text{Cl}_2$ . The filtrate was washed with 1M HCl (1 x 50 mL), water (2 x 50 mL) and dried over anhydrous  $\text{Na}_2\text{SO}_4$ . Removal of  $\text{CH}_2\text{Cl}_2$  gave the pure product **1g** as a yellow liquid. Yield: 0.17 g, 67%.  $^1\text{H}$  NMR (300 MHz,  $\text{CDCl}_3$ )  $\delta$  11.44 (s, 1H), 7.68 (d, 1H,  $J = 3.1$ ), 7.66 (d, 1H,  $J = 3.1$ ), 4.49 (m, 1H), 3.97 (s, 3H), 1.41 (s, 6H).  $^{13}\text{C}$  NMR (75

MHz, CDCl<sub>3</sub>)  $\delta$  169.24, 150.35, 149.50, 124.63, 122.31, 119.37, 118.16, 72.43, 53.67, 22.42. HRMS-ESI: calculated for [M]<sup>+</sup>(C<sub>11</sub>H<sub>13</sub>NO<sub>6</sub>):  $m/z$  254.0665 found:  $m/z$  255.0660.

**Compound 1h: 1e** (2.27 g, 10.0 mmol) was dissolved in anhydrous DMF (30 mL), to which anhydrous K<sub>2</sub>CO<sub>3</sub> (4.00 g, 25.0 mmol) and iodomethane (0.75 mL, 12.0 mmol) was added. The mixture was heated under reflux for 60 °C hrs. CH<sub>2</sub>Cl<sub>2</sub> (100 mL) was then added and the reaction mixture was filtered. The solvent was removed in *vacuo* and the concentrate was dissolved in CH<sub>2</sub>Cl<sub>2</sub> (100 mL), washed with water (2 x 50 mL) and dried over anhydrous Na<sub>2</sub>SO<sub>4</sub>. Removal of CH<sub>2</sub>Cl<sub>2</sub> gave the pure product **1h** as a red solid. Yield: 2.19 g, 91%. <sup>1</sup>H NMR (300 MHz, CDCl<sub>3</sub>)  $\delta$  7.54 (s, 1H), 7.42 (s, 1H), 3.94 (s, 6H), 3.86 (s, 3H). <sup>13</sup>C NMR (75 MHz, CDCl<sub>3</sub>)  $\delta$  165.38, 155.41, 147.39, 146.37, 128.78, 121.66, 114.21, 65.01, 56.90, 53.48. HRMS-EI: calculated for [M]<sup>+</sup>(C<sub>10</sub>H<sub>11</sub>NO<sub>6</sub>):  $m/z$  241.0586 found:  $m/z$  241.0587.

**Compound 1i: 1f** (3.25 g, 10.0 mmol) was dissolved in anhydrous DMF (30 mL), to which anhydrous K<sub>2</sub>CO<sub>3</sub> (4.00 g, 25.0 mmol) and iodomethane (0.75 mL, 12.0 mmol) was added. The mixture was heated under 60 °C for 4 hrs. CH<sub>2</sub>Cl<sub>2</sub> (100 mL) was then added and the reaction mixture was filtered. The solvent was removed in *vacuo* and the concentrate was dissolved in CH<sub>2</sub>Cl<sub>2</sub> (100 mL), washed with water (3 x 50 mL) and dried over anhydrous Na<sub>2</sub>SO<sub>4</sub>. Removal of CH<sub>2</sub>Cl<sub>2</sub> gave the crude product, which was recrystallized from MeOH to give pure product **1i** as a yellow solid. Yield: 2.44 g, 72%. <sup>1</sup>H NMR (300 MHz, CDCl<sub>3</sub>)  $\delta$  7.52 (d, 1H,  $J$  = 3.3), 7.40 (d, 1H,  $J$  = 3.1), 3.93 (m, 2H), 3.92 (s, 3H), 3.61 (s, 3H), 1.77 (m, 2H), 1.43 (m, 2H), 1.27 (m, 8H), 0.86 (m, 3H). <sup>13</sup>C NMR (75 MHz, CDCl<sub>3</sub>)  $\delta$  166.09, 150.52, 149.97, 134.44, 121.35, 115.16, 114.63, 68.91, 54.81, 51.57, 31.81, 29.64, 29.37, 28.95, 25.96, 22.83, 14.06. HRMS-ESI: calculated for [M]<sup>+</sup>(C<sub>17</sub>H<sub>25</sub>NO<sub>6</sub>):  $m/z$  339.1682 found:  $m/z$  339.1691.

**Compound 1j: 1g** (2.55 g, 10.0 mmol) was dissolved in anhydrous DMF (30 mL), to which anhydrous K<sub>2</sub>CO<sub>3</sub> (4.00 g, 25.0 mmol) and iodomethane (0.75 mL, 12.0 mmol) was added. The mixture was heated under 60 °C for 4 hrs. CH<sub>2</sub>Cl<sub>2</sub> (100 mL) was then added and the reaction mixture was filtered. The solvent was removed in *vacuo* and the concentrate was dissolved in CH<sub>2</sub>Cl<sub>2</sub> (100 mL), washed with water (2 x 50 mL) and dried over anhydrous Na<sub>2</sub>SO<sub>4</sub>. Removal of CH<sub>2</sub>Cl<sub>2</sub> gave the pure product **1j** as a red liquid. Yield: 2.19 g, 81%. <sup>1</sup>H NMR (300 MHz, CDCl<sub>3</sub>)  $\delta$  7.52 (d, 1H,  $J$  = 3.2), 7.39 (d, 1H,  $J$  = 3.2), 4.55 (m, 1H), 3.94 (s, 6H), 1.36 (s, 6H). <sup>13</sup>C NMR (75 MHz, CDCl<sub>3</sub>)  $\delta$  165.48, 153.81, 147.12, 146.40, 128.72, 123.45, 115.93, 72.20, 65.01, 53.47, 22.82. HRMS-EI: calculated for [M]<sup>+</sup>(C<sub>12</sub>H<sub>15</sub>NO<sub>6</sub>):  $m/z$  269.0899 found:  $m/z$  269.0902.

**Compound 1k: 1h** (1.25 g, 5.20 mmol) was dissolved in hot MeOH (20 mL), to which 1N NaOH (10 mL, 10.0 mmol) was added. The mixture was heated under reflux for 1 h and then more water (50 mL) was added. The aqueous layer was neutralized by addition of 1M HCl (15 mL). The precipitated crude product was collected by filtration, which was recrystallized from MeOH to give a yellow solid **1k**. Yield: 0.63 g, 53%. <sup>1</sup>H NMR (300 MHz, CDCl<sub>3</sub>)  $\delta$  13.61 (s, 1H), 7.66 (d, 1H,  $J$  = 3.3), 7.51 (d, 1H,  $J$  = 3.3), 3.84 (s, 3H), 3.82 (s, 3H). <sup>13</sup>C NMR (125 MHz, DMSO-*d*<sub>6</sub>)  $\delta$  165.32, 154.47, 145.58, 144.57, 129.01, 120.05, 112.45, 63.81, 56.33. HRMS-ESI: calculated for [M]<sup>+</sup>(C<sub>9</sub>H<sub>9</sub>NO<sub>6</sub>):  $m/z$  226.0352 found:  $m/z$  226.0346.

**Compound 1l: 1i** (2.80 g, 8.30 mmol) was dissolved in hot MeOH (30 mL), to which 1N NaOH (17 mL, 17.0 mmol) was added. The mixture was heated under reflux for 1 h and then quenched with water (100 mL).

The aqueous layer was neutralized by addition of 1M HCl (25 mL). The precipitated crude product was collected by filtration, which was recrystallized from MeOH to give a yellow solid **1l**. Yield: 2.30 g, 85%. <sup>1</sup>H NMR (300 MHz, CDCl<sub>3</sub>)  $\delta$  13.67 (s, 1H), 7.65 (d, 1H, *J* = 3.2), 7.53 (d, 1H, *J* = 3.1), 3.92 (m, 2H), 3.59 (s, 3H), 1.70 (m, 2H), 1.40 (m, 2H), 1.19 (m, 8H), 0.79 (m, 3H). <sup>13</sup>C NMR (125 MHz, CDCl<sub>3</sub>)  $\delta$  165.44, 154.92, 146.40, 144.78, 125.81, 122.18, 116.07, 69.41, 64.78, 31.76, 29.21, 29.16, 28.89, 25.85, 22.62, 14.06. HRMS-EI: calculated for [M]<sup>+</sup> (C<sub>16</sub>H<sub>23</sub>NO<sub>6</sub>): *m/z* 324.1447 found: *m/z* 324.1453.

**Compound 1m: 1j** (2.69 g, 10.0 mmol) was dissolved in hot MeOH (40 mL), to which 1N NaOH (20 mL, 20.0 mmol) was added. The mixture was heated under reflux for 1h and then more water (100 mL) was added. The aqueous layer was neutralized by addition of 1M HCl (30 mL). The precipitated crude product was collected by filtration, which was recrystallized from MeOH to give a yellow solid **1m**. Yield: 1.68 g, 66%. <sup>1</sup>H NMR (300 MHz, CDCl<sub>3</sub>)  $\delta$  7.78 (d, 1H, *J* = 3.2), 7.54 (d, 1H, *J* = 3.2), 4.60 (m, 1H), 4.02 (s, 3H), 1.38 (s, 6H). <sup>13</sup>C NMR (125 MHz, DMSO-*d*<sub>6</sub>)  $\delta$  165.38, 152.69, 145.72, 144.37, 129.08, 121.60, 113.95, 71.02, 63.79, 21.47. HRMS-ESI: calculated for [M]<sup>+</sup> (C<sub>11</sub>H<sub>13</sub>NO<sub>6</sub>): *m/z* 254.0665 found: *m/z* 254.0659.

**Compound 1o: 2-hydroxy-5-methylbenzoic acid** (2.00 g, 13.0 mmol) was dissolved in MeOH (40 mL), to which concentrated H<sub>2</sub>SO<sub>4</sub> (5 mL) was added. The mixture was heated under reflux for 48 hrs. The solvent was then removed in *vacuo* and the residue was dissolved in CH<sub>2</sub>Cl<sub>2</sub> (100 mL), washed with water (2 x 50 mL) and dried over anhydrous Na<sub>2</sub>SO<sub>4</sub>. Removal of CH<sub>2</sub>Cl<sub>2</sub> gave the pure ester which could directly used for the next step. The ester (0.17 g, 1.00 mmol) was dissolved in 20ml CH<sub>2</sub>Cl<sub>2</sub> to which concentrated (69%) HNO<sub>3</sub> (0.10 mL, 1.56 mmol) was added with stirring at -20 °C. Concentrated (95%) H<sub>2</sub>SO<sub>4</sub> (0.20 mL, 2.74 mmol) was then added dropwise to the reaction mixture. After 20 min, the reaction was quenched with 50 mL of distilled water. The CH<sub>2</sub>Cl<sub>2</sub> layer was washed with water (2 x 50 mL) and dried over anhydrous Na<sub>2</sub>SO<sub>4</sub>. Removal of CH<sub>2</sub>Cl<sub>2</sub> gave the pure product **1o** as a yellow solid. Yield: 1.00 g, 80%. <sup>1</sup>H NMR (300 MHz, CDCl<sub>3</sub>)  $\delta$  11.74 (s, 1H), 7.98 (s, 1H), 7.95 (s, 1H), 4.00 (s, 1H), 2.37 (s, 3H). <sup>13</sup>C NMR (125 MHz, CDCl<sub>3</sub>)  $\delta$  169.76, 154.29, 147.91, 136.95, 135.21, 132.26, 129.00, 53.71, 20.86. HRMS-ESI: calculated for [M]<sup>+</sup> (C<sub>9</sub>H<sub>9</sub>NO<sub>5</sub>): *m/z* 210.0402 found: *m/z* 210.0404.

**Compound 1p: 1o** (1.00 g, 4.73 mmol) was dissolved in anhydrous DMF (15 mL), to which anhydrous K<sub>2</sub>CO<sub>3</sub> (2.60 g, 19.0 mmol) and iodomethane (0.75 mL, 12.0 mmol) was added. The mixture was heated under 60 °C for 4 hrs. CH<sub>2</sub>Cl<sub>2</sub> (50 mL) was then added and the reaction mixture was filtered. The solvent was removed in *vacuo* and the concentrate was dissolved in CH<sub>2</sub>Cl<sub>2</sub> (50 mL), washed with water (2 x 50 mL) and dried over anhydrous Na<sub>2</sub>SO<sub>4</sub>. Removal of CH<sub>2</sub>Cl<sub>2</sub> gave the pure product as white solid **1p**. Yield: 1.01 g, 83%. <sup>1</sup>H NMR (300 MHz, CDCl<sub>3</sub>)  $\delta$  7.82 (s, 1H), 7.71 (s, 1H), 3.96 (s, 3H), 3.95 (s, 3H), 2.40 (s, 3H). <sup>13</sup>C NMR (125 MHz, CDCl<sub>3</sub>)  $\delta$  165.72, 151.75, 145.83, 136.72, 134.84, 129.33, 127.72, 64.92, 53.41, 21.20. HRMS-ESI: calculated for [M]<sup>+</sup> (C<sub>10</sub>H<sub>11</sub>NO<sub>5</sub>): *m/z* 224.0553 found: *m/z* 224.0550.

**Compound 1q: 1p** (1.00 g, 4.40 mmol) was dissolved in hot MeOH (20 mL), to which 1N NaOH (10 mL, 10.0 mmol) was added. The mixture was heated under reflux for 1 h and then more water (50 mL) was added. The aqueous layer was neutralized by addition of 1M HCl (15 mL). The precipitated crude product was collected by filtration, which was recrystallized from MeOH to give a white solid **1q**. Yield: 0.51 g, 59%. <sup>1</sup>H NMR (300 MHz, DMSO-*d*<sub>6</sub>)  $\delta$  7.89 (s, 1H), 7.83 (s, 1H), 3.84 (s, 3H), 2.36 (s, 3H). <sup>13</sup>C NMR (125 MHz,

DMSO-*d*<sub>6</sub>)  $\delta$  165.64, 149.20, 144.75, 135.29, 134.36, 127.72, 127.58, 63.64, 19.75. HRMS-ESI: calculated for [M]<sup>+</sup> (C<sub>9</sub>H<sub>9</sub>NO<sub>5</sub>): *m/z* 210.0402 found: *m/z* 210.0400.

**Compound 1r:** Salicylic acid (10.0 g, 72.5 mmol) was dissolved in 200 mL of CH<sub>2</sub>Cl<sub>2</sub>, to which concentrated HNO<sub>3</sub> (69%, 6.05 mL, 94.2 mmol) was added with stirring at 0 °C. Concentrated H<sub>2</sub>SO<sub>4</sub> (95%, 10.6 mL, 145 mmol) was then added dropwise to the reaction mixture. After 20 min, the reaction was quenched with 500 mL of distilled water and the mixture was filtered. The yellow residue was then dried under IR lamp for at least 30 min. The crude product was directly used in the next step without further purification. Crude compound (20.0 g) was dissolved in methanol (260 mL), to which concentrated H<sub>2</sub>SO<sub>4</sub> (21.9 mL, 388 mmol) was added. The mixture was heated under reflux for 48 hrs. The solvent was then removed in *vacuo* and the residue was dissolved in CH<sub>2</sub>Cl<sub>2</sub> (200 mL), washed with water (2 x 100 mL), finally washed with aq NaHCO<sub>3</sub> (100 mL) and dried over anhydrous Na<sub>2</sub>SO<sub>4</sub>. Removal of CH<sub>2</sub>Cl<sub>2</sub> gave a yellow solid which was purified by flash column chromatography (silica gel) using hexane/ CH<sub>2</sub>Cl<sub>2</sub> (4:1) as the eluent to give pure product **1r** as a bright yellow solid. Overall Yield: 14.3 g, 72%. <sup>1</sup>H NMR (300 MHz, CDCl<sub>3</sub>)  $\delta$  11.99 (s, 1H), 8.15 (m, 2H), 7.01 (m, 1H), 4.02 (s, 3H). <sup>13</sup>C NMR (125 MHz, CDCl<sub>3</sub>)  $\delta$  169.16, 155.59, 137.97, 135.67, 131.30, 118.34, 115.78, 53.10. (Ref: Dumn, B.M.; Bruice, T. C. *J. Am. Chem. Soc.* **1970**, 92, 2410)

**Compound 1s:** **1r** (6.00 g, 30.4 mmol) was dissolved in DMF (125 mL) to which anhydrous K<sub>2</sub>CO<sub>3</sub> (15.6 g, 113 mmol) and iodomethane (6.98 mL, 112 mmol) were added to it. The mixture was heated under reflux for 4 hrs. The reaction mixture was then filtered and the solvent was removed in *vacuo*. The residue was dissolved in CH<sub>2</sub>Cl<sub>2</sub> (100 mL), washed with water (2 x 50 mL), and dried over anhydrous Na<sub>2</sub>SO<sub>4</sub>. Removal of CH<sub>2</sub>Cl<sub>2</sub> gave a pure light yellow solid **1s**. Yield: 6.41 g, 82%. <sup>1</sup>H NMR (300 MHz, CDCl<sub>3</sub>)  $\delta$  8.03 (m, 1H), 8.00 (m, 1H), 7.91 (d, 1H, *J* = 1.8), 3.99 (s, 3H), 3.94 (s, 3H). <sup>13</sup>C NMR (75 MHz, CDCl<sub>3</sub>)  $\delta$  164.42, 152.86, 145.17, 135.25, 128.02, 127.06, 123.50, 63.89, 52.39. HRMS-ESI: calculated for [M]<sup>+</sup> (C<sub>8</sub>H<sub>7</sub>NO<sub>5</sub>): *m/z* 211.0481 found: *m/z* 211.0480.

**Compound 1t:** **1s** (4.00 g, 19.0 mmol) was dissolved in hot methanol (10 mL) to which 1M NaOH (40 mL, 40.0 mmol) was added. The mixture was heated under reflux for 2 h and then quenched with water (100 mL). The aqueous layer was neutralized by addition of 1M HCl (80 mL) until the pH was at least 1. The precipitated crude product was collected by filtration, which was recrystallized from hot methanol to give a pure white solid **1t**. Yield: 3.45 g, 92%. <sup>1</sup>H NMR (300 MHz, CDCl<sub>3</sub>)  $\delta$  8.28 (m, 1H), 8.03 (m, 1H), 7.36 (m, 1H), 4.08 (s, 3H). <sup>13</sup>C NMR (125 MHz, CDCl<sub>3</sub>)  $\delta$  164.97, 151.89, 144.49, 134.71, 127.31, 126.79, 122.79, 63.06. (Ref: Lloyd, H. A.; Warren, K. S.; Fales, H. M. *J. Am. Chem. Soc.* **1966**, 88, 5544)

**Compound 2a:** **1s** (3.16 g, 15.0 mmol) was reduced by catalytic hydrogenation in THF (50 mL) at 40 °C, using Pd/C (0.30 g, 10%) as the catalyst for 3 h. The reaction mixture was then filtered and the solvent removed in *vacuo* to give the pure brown liquid. The resulting amine was immediately used for the next coupling. Acid **1t** (3.00 g, 15.2 mmol) was dissolved in CH<sub>2</sub>Cl<sub>2</sub> (30 mL) to which 4-methylmorpholine (NMM (2.20 mL, 17.9 mmol) and ethyl chloroformate (1.96 mL, 16.4 mmol) was added at 0 °C. The reaction mixture was stirred for at least 15 min then a solution of above amine (2.70 g, 14.9 mmol) dissolved in CH<sub>2</sub>Cl<sub>2</sub> (30 mL) was added. The reaction mixture was allowed to stir continuously overnight at room temperature. The reaction mixture was washed with 1M KHSO<sub>4</sub> (100 mL), followed by saturated NaHCO<sub>3</sub>

(100 mL) and saturated NaCl (100 mL). Drying over Na<sub>2</sub>SO<sub>4</sub> and removal of solvent in *vacuo* gave the crude product, which was recrystallized from methanol to give the pure product **2a** as a white solid. Yield: 3.49 g, 71%. <sup>1</sup>H NMR (300 MHz, CDCl<sub>3</sub>) δ 10.37 (s, 1H), 8.80 (d, 1H, *J* = 8.2), 8.44 (d, 1H, *J* = 8.2), 7.99 (d, 1H, *J* = 7.9), 7.63 (d, 1H, *J* = 8.1), 7.41 (t, 1H, *J* = 8.1), 7.24 (t, 1H, *J* = 8.1), 4.10 (s, 3H), 3.95 (s, 6H). <sup>13</sup>C NMR (125 MHz, CDCl<sub>3</sub>) δ 165.85, 161.27, 151.46, 149.43, 136.47, 132.70, 128.75, 126.56, 124.60, 123.51, 64.47, 62.57. HRMS-ESI: calculated for [M+Na]<sup>+</sup> (C<sub>17</sub>H<sub>16</sub>N<sub>2</sub>O<sub>7</sub>Na): *m/z* 383.0850 found: *m/z* 383.0856.

**Compound 3a: 2a** (3.46 g, 10.0 mmol) was reduced by catalytic hydrogenation in THF (50 mL) at 40 °C, using Pd-C (0.35 g, 10%) as the catalyst for 3 h. The reaction mixture was then filtered and the solvent removed in *vacuo* to give the pure amine which was immediately used for the next coupling. Acid **1t** (2.06 g, 10.5 mmol) was dissolved in CH<sub>2</sub>Cl<sub>2</sub> (50 mL) to which NMM (1.35 mL, 12.4 mmol) and ethyl chloroformate (1.08 mL, 11.3 mmol) was added at 0 °C. The reaction mixture was stirred for at least 15 min after which a solution of the above amine (3.10 g, 9.04 mmol) dissolved in CH<sub>2</sub>Cl<sub>2</sub> (50 mL) was added. The reaction mixture was allowed to stir continuously overnight at room temperature. The reaction mixture was washed with 1M KHSO<sub>4</sub> (100 mL), followed by saturated NaHCO<sub>3</sub> (100 mL) and saturated NaCl (100 mL). Drying over Na<sub>2</sub>SO<sub>4</sub> and removal of solvent in *vacuo* gave the crude product, which was recrystallized from methanol to give the pure product **3a** as a white solid. Yield: 3.64 g, 82%. <sup>1</sup>H NMR (300 MHz, CDCl<sub>3</sub>) δ 10.25 (s, 1H), 10.23 (s, 1H), 8.85 (d, 1H, *J* = 7.9), 8.78 (d, 1H, *J* = 7.9), 8.47 (d, 1H, *J* = 7.9), 8.03 (d, 1H, *J* = 8.0), 7.91 (d, 1H, *J* = 7.9), 7.62 (d, 1H, *J* = 7.9), 7.40 (m, 2H), 7.22 (m, 1H), 4.14 (s, 3H), 3.98 (s, 3H), 3.96 (s, 6H). <sup>13</sup>C NMR (75 MHz, CDCl<sub>3</sub>) δ 162.81, 161.33, 151.34, 149.23, 147.29, 144.32, 136.59, 133.03, 131.97, 129.09, 128.97, 126.73, 126.63, 126.22, 125.79, 125.05, 124.71, 124.59, 124.42, 123.45, 64.45, 63.23, 62.50, 53.38, 52.30. HRMS-ESI: calculated for [M+Na]<sup>+</sup> (C<sub>25</sub>H<sub>23</sub>N<sub>3</sub>O<sub>9</sub>): *m/z* 532.1327 found: *m/z* 532.1328.

**Compound 4a: 3a** (3.00 g, 6.09 mmol) was reduced by catalytic hydrogenation in THF (50 mL) at 40 °C, using Pd-C (0.60 g, 20%) as the catalyst for 3 h. The reaction mixture was then filtered and the solvent removed in *vacuo* to give the pure amine which was immediately used for the next coupling. Acid **1t** (1.79 g, 9.10 mmol) was placed in a *very* dry round bottom flask and saturated with nitrogen gas. Freshly-prepared dry CH<sub>2</sub>Cl<sub>2</sub> (50 mL) and DMF (0.42 mL) were added to the acid, followed by dropwise addition of oxalyl chloride, (COCl)<sub>2</sub>, (1.05 mL, 7.27 mmol). The reaction mixture was allowed to stir for 2 hrs. The solvent was then removed in *vacuo* and saturated with nitrogen gas before addition of 15 mL dry CH<sub>2</sub>Cl<sub>2</sub>. The above amine (2.81 g, 6.06 mmol) was dissolved in 35 mL dry CH<sub>2</sub>Cl<sub>2</sub> and triethylamine (TEA, 1.86 mL, 12.1 mmol) before addition to the reaction mixture above. The reaction mixture was stirred at 50 °C for 2 hrs and then was washed with aq NaHCO<sub>3</sub> (100 mL). Drying over anhydrous Na<sub>2</sub>SO<sub>4</sub> and removal of solvent in *vacuo* gave the crude product, which was recrystallized from methanol to give the pure product **4a** as a white solid. Yield: 2.34 g, 61%. <sup>1</sup>H NMR (500 MHz, CDCl<sub>3</sub>) δ 10.20 (s, 1H), 10.10 (s, 1H), 10.00 (s, 1H), 8.76 (m, 3H), 8.44 (m, 1H), 8.03 (m, 1H), 7.90 (m, 2H), 7.61 (m, 1H), 7.40 (m, 3H), 7.22 (m, 1H), 4.13 (s, 3H), 3.97 (s, 3H), 3.95 (s, 3H), 3.94 (s, 3H). <sup>13</sup>C NMR (125 MHz, CDCl<sub>3</sub>) δ 165.80, 162.86, 161.42, 151.21, 149.19, 147.17, 144.29, 136.39, 132.58, 131.86, 129.20, 128.57, 126.69, 126.57, 126.28, 126.14, 125.67, 124.63, 123.41, 64.40, 63.07, 62.37, 52.26. HRMS-ESI: calculated for [M+Na]<sup>+</sup> (C<sub>33</sub>H<sub>30</sub>N<sub>4</sub>O<sub>11</sub>Na): *m/z* 681.1803 found: *m/z* 681.1791.

**Compound 2h: 4a** (0.61 g, 0.95 mmol) was reduced by catalytic hydrogenation in THF (50 mL) at 50 °C, using Pd-C (0.75 g, 20%) as the catalyst for 3 h. The reaction mixture was then filtered and the solvent removed in *vacuo* to give the pure amine which was immediately used for the next coupling. Acid **1t** (0.27 g, 1.36 mmol) was placed in a *very* dry round bottom flask and saturated with nitrogen gas. Freshly-prepared dry CH<sub>2</sub>Cl<sub>2</sub> (5 mL) and DMF (60 µL) were added to the acid, followed by dropwise addition of oxalyl chloride (142 µL, 1.12 mmol). The reaction mixture was allowed to stir for 2 hrs. The solvent was then removed in *vacuo* and saturated with nitrogen gas before addition of 10 mL dry CH<sub>2</sub>Cl<sub>2</sub>. The above amine (0.57 g, 0.93 mmol) was dissolved in 25 mL dry CH<sub>2</sub>Cl<sub>2</sub> and triethylamine, triethylamine (0.27 mL, 1.86 mmol) before addition to the reaction mixture above. The reaction mixture was stirred at 50 °C for 2 hrs and then was washed with aq NaHCO<sub>3</sub> (50 mL). Drying over anhydrous Na<sub>2</sub>SO<sub>4</sub> and removal of solvent in *vacuo* gave the crude product which was recrystallised from methanol and further purified by flash column chromatography (silica gel as the stationary phase) using CH<sub>2</sub>Cl<sub>2</sub>/CH<sub>3</sub>CN (10:1) as the eluent to give pure product **5a** as a white solid. Yield: 0.44 g, 61%. <sup>1</sup>H NMR (300 MHz, CDCl<sub>3</sub>) δ 10.25 (d, 2H), 9.85 (s, 1H), 9.65 (s, 1H), 8.81 (m, 4H), 8.44 (m, 1H), 8.02 (m, 4H), 7.89 (m, 2H), 7.61 (m, 4H), 4.03 (s, 15H), 3.88 (m, 3H). <sup>13</sup>C NMR (125 MHz, CDCl<sub>3</sub>) δ 165.56, 163.06, 162.81, 161.42, 151.25, 149.22, 147.24, 147.19, 144.14, 136.40, 132.17, 131.91, 128.84, 126.49, 125.69, 124.75, 123.25, 64.38, 63.14, 62.97, 52.10. HRMS-ESI: calculated for [M+Na]<sup>+</sup> (C<sub>41</sub>H<sub>37</sub>N<sub>3</sub>O<sub>13</sub>Na): *m/z* 830.2280 found: *m/z* 830.2304.

**Compound 2h: 2a** (1.00 g, 2.78 mmol) was dissolved in hot methanol (20 mL) to which 1M KOH (10 mL, 10.0 mmol) and KCl (0.98 g, 10.0 mmol) was added. The mixture was heated under reflux for 2 h and then quenched with water (50 mL). The aqueous layer was neutralized by addition of 1M HCl (15 mL) until pH = 1. The precipitated crude product was collected by filtration, which was recrystallized from hot methanol to give a pure white solid **2g**. Yield: 0.80 g, 83%. <sup>1</sup>H NMR (300 MHz, CDCl<sub>3</sub>) δ 10.39 (s, 1H), 8.93 (d, 1H, *J* = 8.2), 8.45 (d, 1H, *J* = 7.6), 8.00 (d, 1H, *J* = 7.6), 7.77 (d, 1H, *J* = 7.6), 7.43 (s, 1H), 7.31 (m, 1H), 4.10 (s, 3H), 4.03 (s, 3H). <sup>13</sup>C NMR (75 MHz, DMSO-*d*<sub>6</sub>) δ 167.32, 163.39, 150.76, 150.58, 144.40, 135.00, 132.52, 131.59, 127.79, 127.09, 126.37, 126.16, 125.14, 124.17. HRMS-ESI: calculated for [M+Na]<sup>+</sup> (C<sub>16</sub>H<sub>14</sub>N<sub>2</sub>O<sub>7</sub>Na): *m/z* 345.0723 found: *m/z* 345.0714.

**Compound 6a: 4a** (0.36 g, 0.55 mmol) was reduced by catalytic hydrogenation in THF (20 mL) at 50 °C, using Pd-C (0.070 g, 20%) as the catalyst for 3 h. The reaction mixture was then filtered and the solvent removed in *vacuo* to give the pure amine which was immediately used for the next coupling. Acid **2h** (0.22 g, 0.66 mmol) was placed in a *very* dry round bottom flask and saturated with nitrogen gas. Freshly-prepared dry CH<sub>2</sub>Cl<sub>2</sub> (5 mL) and DMF (40 µL) were added to the acid, followed by dropwise addition of oxalyl chloride (100 µL, 0.79 mmol). The reaction mixture was allowed to stir for 4 hrs. The solvent was then removed in *vacuo* and saturated with nitrogen gas before addition of 10 mL dry CH<sub>2</sub>Cl<sub>2</sub>. The above amine (0.32 g, 0.51 mmol) was dissolved in 15 mL dry CH<sub>2</sub>Cl<sub>2</sub> and triethylamine (0.15 mL, 1.02 mmol) before addition to the reaction mixture above. The reaction mixture was stirred at 50 °C for 6 hrs and then was washed with aq NaHCO<sub>3</sub> (30 mL). Drying over anhydrous Na<sub>2</sub>SO<sub>4</sub> and removal of solvent in *vacuo* gave the crude product which was purified by flash column chromatography (silica gel as the stationary phase) using CH<sub>2</sub>Cl<sub>2</sub> / CH<sub>3</sub>CN (10:1) as the eluent to give pure product **6a** as a white solid. Yield: 0.12 g, 19%. <sup>1</sup>H NMR (500 MHz, CDCl<sub>3</sub>) δ 10.28 (s, 1H), 10.19 (s, 1H), 10.15 (s, 1H), 10.12 (s, 1H), 9.84 (s, 1H), 8.85 (m, 2H),



8.80 (m, 3H), 8.33 (d, 1H,  $J = 7.8$ ) 7.82 (m, 5H), 7.51 (d, 1H,  $J = 7.8$ ), 7.39 (m, 5H), 7.15 (d, 1H), 4.08 (s, 3H), 4.04 (s, 3H), 4.02 (s, 3H), 4.01 (s, 3H), 3.96 (s, 3H), 3.79 (s, 6H).  $^{13}\text{C}$  NMR (125 MHz,  $\text{CDCl}_3$ )  $\delta$  165.36, 163.34, 163.04, 162.93, 162.82, 161.32, 151.00, 149.09, 147.21, 147.19, 147.08, 144.10, 136.37, 133.12, 132.34, 132.16, 132.03, 129.06, 128.80, 126.79, 126.65, 126.55, 126.47, 126.36, 126.31, 126.18, 126.03, 125.97, 125.92, 125.84, 125.35, 125.13, 124.99, 124.88, 124.84, 124.68, 124.43, 123.10, 64.46, 63.26, 63.10, 63.00, 62.97, 62.25, 52.23. HRMS-ESI: calculated for  $[\text{M}+\text{Na}]^+$  ( $\text{C}_{49}\text{H}_{44}\text{N}_6\text{O}_{15}\text{Na}$ ):  $m/z$  979.2957 found:  $m/z$  979.2765.

**Compound 2b: 1h** (1.70 g, 8.00 mmol) was reduced by catalytic hydrogenation in THF (50 mL) at 40  $^\circ\text{C}$ , using Pd/C (0.17 g, 10%) as the catalyst for 3 h. The reaction mixture was then filtered and the solvent removed in *vacuo* to give the pure brown liquid. The resulting amine was immediately used for the next coupling. Acid **1t** (2.00 g, 10.1 mmol) was dissolved in  $\text{CH}_2\text{Cl}_2$  (30 mL) to which NMM (2.00 mL, 18.3 mmol) and ethyl chloroformate (1.50 mL, 12.6 mmol) was added at 0  $^\circ\text{C}$ . The reaction mixture was stirred for at least 15 min then a solution of above amine dissolved in  $\text{CH}_2\text{Cl}_2$  (30 mL) was added. The reaction mixture was allowed to stir continuously overnight at room temperature. The reaction mixture was washed with 1M  $\text{KHSO}_4$  (100 mL), followed by saturated  $\text{NaHCO}_3$  (100 mL) and saturated NaCl (100 mL). Drying over  $\text{Na}_2\text{SO}_4$  and removal of solvent in *vacuo* gave the crude product, which was recrystallized from methanol to give the pure product **2b** as a white solid. Yield: 2.40 g, 77%.  $^1\text{H}$  NMR (500 MHz,  $\text{CDCl}_3$ )  $\delta$  10.35 (s, 1H), 8.47 (d, 1H,  $J = 3.2$ ), 8.43 (d, 1H,  $J = 8.1$ ), 7.98 (d, 1H,  $J = 7.8$ ), 7.40 (t, 1H,  $J = 8.1$ ), 7.13 (d, 1H,  $J = 3.2$ ), 4.08 (s, 3H), 3.94 (s, 3H), 3.89 (s, 3H), 3.85 (s, 3H).  $^{13}\text{C}$  NMR (125 MHz,  $\text{CDCl}_3$ )  $\delta$  165.67, 161.29, 155.59, 151.48, 144.36, 143.30, 136.43, 133.40, 129.08, 128.80, 124.81, 123.76, 111.00, 110.73, 64.47, 62.57, 55.84, 52.39. HRMS-ESI: calculated for  $[\text{M}]^+$  ( $\text{C}_{18}\text{H}_{18}\text{N}_2\text{O}_8$ ):  $m/z$  389.0990 found:  $m/z$  389.0985.

**Compound 2d: 1h** (0.60 g, 2.49 mmol) was reduced by catalytic hydrogenation in THF (15 mL) at 40  $^\circ\text{C}$  for 3 h. The resulting amine was dissolved in  $\text{CH}_2\text{Cl}_2$  (30 mL) was immediately used for the next coupling. Acid **1k** (0.74 g, 3.24 mmol) was dissolved in  $\text{CH}_2\text{Cl}_2$  (30 mL) to which NMM (0.45 mL, 3.68 mmol) and ethyl chloroformate (0.40 mL, 3.34 mmol) was added at 0  $^\circ\text{C}$ . The reaction mixture was stirred for at least 15 min then a solution of the above amine was added. The reaction mixture was allowed to stir continuously overnight at room temperature. The reaction mixture was washed with 1M  $\text{KHSO}_4$  (30 mL), followed by saturated  $\text{NaHCO}_3$  (30 mL) and saturated NaCl (30 mL). Drying over  $\text{Na}_2\text{SO}_4$  and removal of solvent in *vacuo* gave the crude product, which was recrystallized from methanol to give the pure product **2d** as a yellow solid. Yield: 0.75 g, 72%.  $^1\text{H}$  NMR (300 MHz,  $\text{DMSO}-d_6$ )  $\delta$  10.25 (s, 1H), 8.10 (d, 1H,  $J = 3.3$ ), 7.70 (d, 1H,  $J = 3.3$ ), 7.61 (d, 1H,  $J = 3.5$ ), 7.04 (d, 1H,  $J = 3.1$ ), 3.87 (m, 15H).  $\delta$  10.37 (s, 1H), 8.80 (d, 1H,  $J = 6.57$ ), 8.44 (d, 1H,  $J = 6.09$ ), 7.99 (d, 1H,  $J = 6.24$ ), 7.63 (d, 1H,  $J = 6.27$ ), 7.43 (m, 2H), 4.10 (s, 3H), 3.95 (s, 6H).  $^{13}\text{C}$  NMR (125 MHz,  $\text{CDCl}_3$ )  $\delta$  155.52, 144.72, 143.28, 133.37, 129.59, 123.74, 120.63, 111.64, 111.05, 110.62, 64.60, 62.65, 56.27, 55.81, 52.38. HRMS-ESI: calculated for  $[\text{M}+\text{Na}]^+$  ( $\text{C}_{19}\text{H}_{20}\text{N}_2\text{O}_9\text{Na}$ ):  $m/z$  443.1061 found:  $m/z$  443.1065.

**Compound 2e: 1h** (0.50 g, 2.37 mmol) was reduced by catalytic hydrogenation in THF (15 mL) at 60  $^\circ\text{C}$  for 3 h. The resulting amine was dissolved in  $\text{CH}_2\text{Cl}_2$  (30 mL) was immediately used for the next coupling. Acid **1k** (0.90 g, 2.84 mmol) was dissolved in  $\text{CH}_2\text{Cl}_2$  (30 mL) to which NMM (0.45 mL, 3.68 mmol) and ethyl

chloroformate (0.40 mL, 3.26 mmol) was added at 0 °C. The reaction mixture was stirred for at least 15 min then a solution of the above amine was added. The reaction mixture was allowed to stir continuously overnight at room temperature. The reaction mixture was washed with 1M KHSO<sub>4</sub> (30 mL), followed by saturated NaHCO<sub>3</sub> (30 mL) and saturated NaCl (30 mL). Drying over Na<sub>2</sub>SO<sub>4</sub> and removal of solvent in *vacuo* gave the crude product, which was recrystallized from methanol to give the pure product **2e** as a yellow solid. Yield: 0.90 g, 73%. <sup>1</sup>H NMR (300 MHz, DMSO-d<sub>6</sub>) δ 10.49 (s, 1H), 8.48 (d, 1H, *J* = 3.2), 7.94 (d, 1H, *J* = 3.2), 7.49 (d, 1H, *J* = 3.2), 7.14 (d, 1H, *J* = 3.2), 4.03 (m, 2H), 4.02 (s, 3H), 3.94 (s, 3H), 3.89 (s, 3H), 3.86 (s, 3H), 1.81 (m, 2H), 1.35 (m, 10H), 0.92 (m, 3H). <sup>13</sup>C NMR (125 MHz, CDCl<sub>3</sub>) δ 165.67, 161.27, 155.54, 155.18, 144.72, 144.64, 143.31, 133.43, 129.50, 123.78, 121.14, 115.09, 111.02, 110.64, 69.29, 64.59, 62.66, 55.81, 52.37, 31.75, 30.87, 29.21, 28.91, 25.85, 22.61, 14.05. HRMS-ESI: calculated for [M+Na]<sup>+</sup> (C<sub>26</sub>H<sub>34</sub>N<sub>2</sub>O<sub>9</sub>Na): *m/z* 541.2157 found: *m/z* 541.2152.

**Compound 3b:** **2b** (1.05 g, 2.70 mmol) was reduced by catalytic hydrogenation in THF (20 mL) at 40 °C, using Pd-C (0.16 g, 15%) as the catalyst for 3 h. The reaction mixture was then filtered and the solvent removed in *vacuo* to give the pure amine which was immediately used for the next coupling. Acid **1t** (0.74 g, 3.30 mmol) was dissolved in CH<sub>2</sub>Cl<sub>2</sub> (20 mL) to which NMM (0.50 mL, 4.06 mmol) and ethyl chloroformate (0.40 mL, 3.33 mmol) was added at 0 °C. The reaction mixture was stirred for at least 15 min after which a solution of the above amine dissolved in CH<sub>2</sub>Cl<sub>2</sub> (20 mL) was added. The reaction mixture was allowed to stir continuously overnight at room temperature. The reaction mixture was washed with 1M KHSO<sub>4</sub> (30 mL), followed by saturated NaHCO<sub>3</sub> (30 mL) and saturated NaCl (30 mL). Drying over Na<sub>2</sub>SO<sub>4</sub> and removal of solvent in *vacuo* gave the crude product, which was recrystallized from methanol to give the pure product **3b** as a white solid. Yield: 1.20 g, 78%. <sup>1</sup>H NMR (300 MHz, CDCl<sub>3</sub>) δ 10.38 (s, 1H), 10.25 (s, 1H), 8.78 (d, 1H, *J* = 8.4), 8.54 (d, 1H, *J* = 2.8), 7.99 (d, 1H, *J* = 3.5), 7.91 (d, 1H, *J* = 8.0), 7.54 (d, 1H, *J* = 3.2), 7.37 (t, 1H, *J* = 7.9), 7.14 (d, 1H, *J* = 3.2), 4.07 (s, 3H), 3.97 (s, 3H), 3.95 (s, 3H), 3.93 (s, 3H), 3.90 (s, 3H), 3.89 (s, 3H). <sup>13</sup>C NMR (75 MHz, CDCl<sub>3</sub>) δ 161.16, 155.60, 147.29, 144.65, 133.66, 131.95, 129.52, 126.62, 125.71, 124.65, 123.64, 120.81, 114.63, 110.75, 110.41, 64.50, 63.19, 62.53, 56.27, 55.78, 52.32. HRMS-ESI: calculated for [M]<sup>+</sup> (C<sub>27</sub>H<sub>27</sub>N<sub>3</sub>O<sub>11</sub>Na): *m/z* 592.1538 found: *m/z* 592.1534.

**Compound 3c:** **2d** (0.31 g, 0.74 mmol) was reduced by catalytic hydrogenation in THF (50 mL) at 40 °C, using Pd-C (0.040 g, 10%) as the catalyst for 3 h. The reaction mixture was then filtered and the solvent removed in *vacuo* to give the pure amine which was immediately used for the next coupling. Acid **1t** (0.22 g, 0.96 mmol) was dissolved in CH<sub>2</sub>Cl<sub>2</sub> (10 mL) to which NMM (0.15 mL, 1.95 mmol) and ethyl chloroformate (0.12 mL, 1.43 mmol) was added at 0 °C. The reaction mixture was stirred for at least 15 min after which a solution of the above amine dissolved in CH<sub>2</sub>Cl<sub>2</sub> (10 mL) was added. The reaction mixture was allowed to stir continuously overnight at room temperature. The reaction mixture was washed with 1M KHSO<sub>4</sub> (20 mL), followed by saturated NaHCO<sub>3</sub> (20 mL) and saturated NaCl (20 mL). Drying over Na<sub>2</sub>SO<sub>4</sub> and removal of solvent in *vacuo* gave the crude product, which was recrystallized from methanol to give the pure product **3c** as a white solid. Yield: 0.37 g, 83%. <sup>1</sup>H NMR (300 MHz, CDCl<sub>3</sub>) δ 10.39 (s, 2H), 8.54 (d, 1H, *J* = 3.2), 8.44 (d, 1H, *J* = 3.2), 7.98 (d, 1H, *J* = 3.2), 7.54 (d, 1H, *J* = 3.2), 7.44 (d, 1H, *J* = 3.2), 7.14 (d, 1H, *J* = 3.2), 4.06 (s, 3H), 3.95 (s, 3H), 3.92 (s, 9H), 3.90 (s, 3H), 3.86 (s, 3H). <sup>13</sup>C NMR (75 MHz, CDCl<sub>3</sub>) δ 165.73, 162.62, 161.18, 156.75, 155.67, 144.72, 143.07, 141.21, 133.75, 132.73, 129.53, 126.70, 125.02, 123.74, 122.06,

120.76, 120.19, 117.42, 114.81, 111.17, 110.91, 110.39, 64.57, 63.42, 62.58, 56.34, 55.88, 55.84, 52.39. HRMS-ESI: calculated for  $[M+Na]^+$  ( $C_{28}H_{29}N_3O_{12}Na$ ):  $m/z$  622.1643 found:  $m/z$  622.1646.

**Compound 3d:** **2e** (0.90 g, 1.84 mmol) was reduced by catalytic hydrogenation in THF (20 mL) at 60 °C for 3 h. The resulting amine was dissolved in  $CH_2Cl_2$  (30 mL) was immediately used for the next coupling. Acid **1k** (0.60 g, 2.64 mmol) was dissolved in  $CH_2Cl_2$  (30 mL) to which NMM (0.40 mL, 3.25 mmol) and ethyl chloroformate (0.35 mL, 2.92 mmol) was added at 0 °C. The reaction mixture was stirred for at least 15 min then a solution of the above amine was added. The reaction mixture was allowed to stir continuously overnight at room temperature. The reaction mixture was washed with 1M  $KHSO_4$  (30 mL), followed by saturated  $NaHCO_3$  (30 mL) and saturated  $NaCl$  (30 mL). Drying over  $Na_2SO_4$  and removal of solvent in *vacuo* gave the crude product, which was recrystallized from methanol to give the pure product **3d** as a yellow solid. Yield: 0.86 g, 67%.  $^1H$  NMR (300 MHz,  $CDCl_3$ )  $\delta$  10.39 (s, 1H), 10.37 (s, 1H), 8.54 (d, 1H,  $J$  = 3.2), 8.41 (d, 1H,  $J$  = 3.2), 7.98 (d, 1H,  $J$  = 3.2), 7.53 (d, 1H,  $J$  = 3.5), 7.42 (d, 1H,  $J$  = 3.2), 7.13 (d, 1H,  $J$  = 3.2), 4.06 (s, 3H), 4.03 (m, 2H), 3.95 (s, 3H), 3.91 (s, 3H), 3.89 (s, 3H), 3.86 (s, 3H), 1.78 (m, 2H), 1.31 (m, 10H), 0.85 (m, 3H).  $^{13}C$  NMR (500 MHz,  $CDCl_3$ )  $\delta$  162.67, 161.13, 156.31, 155.71, 155.63, 144.68, 143.04, 141.02, 133.76, 132.60, 129.55, 126.59, 123.70, 120.75, 114.73, 111.69, 110.92, 110.84, 110.37, 68.69, 64.53, 63.38, 62.55, 56.30, 55.81, 52.36, 31.78, 29.28, 29.20, 29.14, 15.95, 22.62, 14.06. HRMS-ESI: calculated for  $[M]^+$  ( $C_{35}H_{43}N_3O_{12}$ ):  $m/z$  720.2739 found:  $m/z$  720.2757.

**Compound 1u:** **1k** (0.40 g, 1.76 mmol), isopropamine (0.14 g, 2.37 mmol) was dissolved in  $CH_2Cl_2$  (30 mL), to which EDC (0.50 g, 2.60 mmol) and HOBT (0.50 g, 3.70 mmol) was added. The reaction mixture was stirred for overnight at room temperature. The reaction mixture was washed with 1M  $KHSO_4$  (30 mL), followed by saturated  $NaHCO_3$  (30 mL) and saturated  $NaCl$  (30 mL). Drying over  $Na_2SO_4$  and removal of solvent in *vacuo* gave the product **1u**. Yield: 0.45 g, 95%.  $^1H$  NMR (300 MHz,  $CDCl_3$ )  $\delta$  7.79 (d, 1H,  $J$  = 3.2), 7.41 (d, 1H,  $J$  = 3.2), 7.30 (s, 1H), 3.90 (s, 1H), 3.87 (s, 1H), 1.28 (s, 3H), 1.27 (s, 3H).  $^{13}C$  NMR (125 MHz,  $CDCl_3$ )  $\delta$  163.01, 156.24, 145.04, 143.44, 131.38, 121.15, 114.16, 64.59, 57.59, 56.90, 46.15, 45.53, 42.55. HRMS-EI: calculated for  $[M]^+$  ( $C_8H_8O_4$ ):  $m/z$  268.1059 found:  $m/z$  268.1055.

**Compound 2f:** **1u** (0.45 g, 1.68 mmol) was reduced by catalytic hydrogenation in THF (30 mL) at 40 °C for 3 h. The resulting amine was dissolved in  $CH_2Cl_2$  (40 mL) was immediately used for the next coupling. Acid **1l** (0.74 g, 2.24 mmol) was dissolved in  $CH_2Cl_2$  (40 mL) to which NMM (0.40 mL, 3.27 mmol) and ethyl chloroformate (0.30 mL, 2.45 mmol) was added at 0 °C. The reaction mixture was stirred for at least 15 min then a solution of the above amine was added. The reaction mixture was allowed to stir continuously overnight at room temperature. The reaction mixture was washed with 1M  $KHSO_4$  (30 mL), followed by saturated  $NaHCO_3$  (30 mL) and saturated  $NaCl$  (30 mL). Drying over  $Na_2SO_4$  and removal of solvent in *vacuo* gave the crude product, which was recrystallized from methanol to give the pure product **2f** as a yellow solid. Yield: 0.35g, 64%.  $^1H$  NMR (300 MHz,  $CDCl_3$ )  $\delta$  10.24 (s, 1H), 8.34 (d, 1H,  $J$  = 3.2), 7.92 (d, 1H,  $J$  = 3.2), 7.50 (d, 1H,  $J$  = 3.9), 7.26 (d, 1H,  $J$  = 3.2), 7.22 (d, 1H,  $J$  = 3.2), 4.33 (m, 1H), 4.03 (s, 5H), 3.82 (s, 6H), 1.80 (m, 2H), 1.24 (m, 16H), 0.88 (m, 3H).  $^{13}C$  NMR (125 MHz,  $CDCl_3$ )  $\delta$  164.44, 161.88, 157.14, 155.99, 145.33, 145.13, 141.52, 133.07, 130.33, 128.14, 121.89, 115.76, 110.88, 110.66, 69.99, 65.33, 63.24, 56.48,

42.24, 32.43, 29.89, 29.85, 29.59, 26.53, 23.29, 14.74. HRMS-ESI: calculated for  $[M]^-$  ( $C_{28}H_{39}N_3O_8$ ):  $m/z$  544.2664 found:  $m/z$  544.2680.

**Compound 2c:** **1s** (1.60 g, 8.80 mmol) was reduced by catalytic hydrogenation in THF (50 mL) at 40 °C, using Pd-C (0.16 g, 10%) as the catalyst for 3 h. The resulting amine was dissolved in  $CH_2Cl_2$  (60 mL) was immediately used for the next coupling. Acid **1l** (3.44 g, 10.6 mmol) was dissolved in  $CH_2Cl_2$  (90 mL) to which NMM (1.40 mL, 11.2 mmol) and ethyl chloroformate (1.50 mL, 12.2 mmol) was added at 0 °C. The reaction mixture was stirred for at least 15 min then the solution of above amine was added. The reaction mixture was allowed to stir continuously overnight at room temperature. The reaction mixture was washed with 1M  $KHSO_4$  (100 mL), followed by saturated  $NaHCO_3$  (100 mL) and saturated NaCl (100 mL). Drying over  $Na_2SO_4$  and removal of solvent in *vacuo* gave the crude product, which was purified by flash column chromatography (silica gel) using hexane/ethyl acetate (8:1 v/v) as the eluent to give pure yellow solid **2c**. Yield: 2.00 g, 47%.  $^1H$  NMR (300 MHz,  $CDCl_3$ )  $\delta$  10.46 (s, 1H), 8.77 (d, 1H,  $J = 5.1$ ), 7.93 (d, 1H,  $J = 3.5$ ), 7.61 (d, 1H,  $J = 8.9$ ), 7.48 (d, 1H,  $J = 3.5$ ), 7.21 (m, 1H), 4.02 (m, 2H), 3.94 (s, 6H), 1.81 (m, 2H), 1.44 (m, 2H), 1.30 (m, 8H), 0.84 (m, 3H).  $^{13}C$  NMR (125 MHz,  $CDCl_3$ )  $\delta$  165.84, 161.22, 155.17, 149.45, 144.70, 144.61, 132.74, 129.60, 126.50, 124.55, 124.23, 123.52, 121.27, 114.94, 69.26, 64.56, 62.55, 52.31, 31.74, 29.20, 29.15, 28.91, 25.85, 22.60, 14.04. HRMS-ESI: calculated for  $[M+Na]^+$  ( $C_{25}H_{32}N_2O_8Na$ ):  $m/z$  511.2051 found:  $m/z$  511.2038

**Compound 3e:** **2c** (1.00 g, 2.18 mmol) was reduced by catalytic hydrogenation in THF (20 mL) at 40 °C, using Pd-C (0.10 g, 10%) as the catalyst for 3 h. The resulting amine was dissolved in  $CH_2Cl_2$  (20 mL) was immediately used for the next coupling. Acid **1m** (0.70 g, 2.75 mmol) was dissolved in  $CH_2Cl_2$  (30 mL) to which NMM (0.40 mL, 3.25 mmol) and ethyl chloroformate (0.35 mL, 2.93 mmol) was added at 0 °C. The reaction mixture was stirred for at least 15 min then the solution of above amine was added. The reaction mixture was allowed to stir continuously overnight at 50 °C. The reaction mixture was washed with 1M  $KHSO_4$  (50 mL), followed by saturated  $NaHCO_3$  (50 mL) and saturated NaCl (50 mL). Drying over  $Na_2SO_4$  and removal of solvent in *vacuo* gave the crude product, which was purified by flash column chromatography (silica gel) using hexane/ethyl acetate (5:1 v/v) as the eluent to give pure yellow solid **3e**. Yield: 1.00 g, 52%.  $^1H$  NMR (300 MHz,  $CDCl_3$ )  $\delta$  10.37 (s, 1H), 10.36 (s, 1H), 8.84 (d, 1H,  $J = 3.2$ ), 8.42 (d, 1H,  $J = 3.3$ ), 7.94 (d, 1H,  $J = 3.2$ ), 7.60 (d, 1H,  $J = 1.7$ ), 7.50 (d, 1H,  $J = 3.2$ ), 7.42 (d, 1H,  $J = 3.2$ ), 7.24 (m, 1H), 4.65 (m, 1H), 4.06 (s, 3H), 4.05 (m, 2H), 3.96 (s, 3H), 3.95 (s, 3H), 3.91 (s, 3H), 1.83 (m, 2H), 1.54 (s, 6H), 1.40 (m, 8H), 1.24 (m, 2H), 0.88 (m, 3H).  $^{13}C$  NMR (75 MHz,  $CDCl_3$ )  $\delta$  165.89, 162.64, 161.24, 156.31, 154.17, 149.22, 144.77, 144.33, 141.00, 133.08, 132.62, 129.51, 126.71, 126.10, 124.52, 124.33, 123.50, 122.25, 116.26, 111.58, 111.04, 71.56, 68.65, 64.47, 63.33, 62.43, 52.27, 31.77, 29.27, 29.16, 25.95, 22.61, 21.73, 14.03. HRMS-ESI: calculated for  $[M]^+$  ( $C_{36}H_{45}N_3O_{11}$ ):  $m/z$  718.2946 found:  $m/z$  718.2952.

**Compound 4b:** **3e** (0.84 g, 1.20 mmol) was reduced by catalytic hydrogenation in THF (20 mL) at 40 °C, using Pd-C (0.17 g, 20%) as the catalyst for 3 h. The reaction mixture was then filtered and the solvent removed in *vacuo* to give the pure amine which was immediately used for the next coupling. Acid **1q** (0.30 g, 1.42 mmol) was placed in a very dry round bottom flask and saturated with nitrogen gas. Freshly-prepared dry  $CH_2Cl_2$  (8 mL) and DMF (64  $\mu$ L) were added to the acid, followed by dropwise addition of oxalyl

chloride (0.16 mL, 1.26 mmol). The reaction mixture was allowed to stir for 4 hrs. The solvent was then removed in *vacuo* and saturated with nitrogen gas before addition of 10 mL dry CH<sub>2</sub>Cl<sub>2</sub>. The above amine (0.80 g, 1.20 mmol) was dissolved in 15 mL dry CH<sub>2</sub>Cl<sub>2</sub> and triethylamine (0.60 mL, 4.2 mmol) before addition to the reaction mixture above. The reaction mixture was stirred at 50 °C for 6 hrs and then was washed with aq NaHCO<sub>3</sub> (50 mL). Drying over anhydrous Na<sub>2</sub>SO<sub>4</sub> and removal of solvent in *vacuo* gave the crude product which was recrystallised from methanol and further purified by flash column chromatography (silica gel as the stationary phase) using hexane/ethyl acetate (2:1 v/v) as the eluent to give pure **4b** as white solid. Yield: 0.59 g, 57%. <sup>1</sup>H NMR (300 MHz, CDCl<sub>3</sub>) δ 10.33 (s, 1H), 10.14 (s, 1H), 10.10 (s, 1H), 8.84 (d, 1H, *J* = 7.0), 8.46 (d, 1H, *J* = 2.8), 8.41 (d, 1H, *J* = 3.2), 8.23 (d, 1H, *J* = 1.7), 7.83 (d, 1H, *J* = 1.7), 7.61 (d, 1H, *J* = 7.0), 7.42 (m, 2H), 7.23 (m, 1H), 4.66 (m, 1H), 4.09 (s, 3H), 4.05 (m, 2H), 3.96 (s, 3H), 3.94 (s, 6H), 3.91 (s, 3H), 2.48 (s, 3H), 1.84 (m, 2H), 1.48 (s, 6H), 1.39 (m, 8H), 1.22 (m, 2H), 0.87 (m, 3H). <sup>13</sup>C NMR (75 MHz, CDCl<sub>3</sub>) δ 165.92, 162.79, 162.74, 161.64, 156.33, 155.17, 149.26, 149.03, 143.98, 140.85, 136.83, 135.67, 133.08, 132.93, 132.66, 129.13, 128.63, 126.74, 126.60, 126.18, 126.04, 124.68, 124.40, 123.44, 113.06, 112.39, 111.42, 111.08, 110.80, 70.74, 68.62, 64.40, 63.31, 63.24, 62.42, 52.37, 31.80, 29.66, 29.30, 29.22, 29.17, 25.97, 22.64, 21.97, 20.68, 14.09. HRMS-ESI: calculated for [M+Na]<sup>+</sup> (C<sub>45</sub>H<sub>54</sub>N<sub>4</sub>O<sub>13</sub>Na): *m/z* 881.3580 found: *m/z* 881.3572.

**Compound 5b: 4b** (0.40 g, 0.47 mmol) was reduced by catalytic hydrogenation in THF (20 mL) at 50 °C, using Pd-C (0.08 g, 20%) as the catalyst for 3 h. The reaction mixture was then filtered and the solvent removed in *vacuo* to give the pure amine which was immediately used for the next coupling. Acid **1m** (0.24 g, 0.94 mmol) was placed in a very dry round bottom flask and saturated with nitrogen gas. Freshly-prepared dry CH<sub>2</sub>Cl<sub>2</sub> (8 mL) and DMF (40 μL) were added to the acid, followed by dropwise addition of oxalyl chloride (0.10 mL, 0.78 mmol). The reaction mixture was allowed to stir for 4 hrs. The solvent was then removed in *vacuo* and saturated with nitrogen gas before addition of 10 mL dry CH<sub>2</sub>Cl<sub>2</sub>. The above amine (0.39 g, 0.47 mmol) was dissolved in 10 mL dry CH<sub>2</sub>Cl<sub>2</sub> and triethylamine (0.40 mL, 2.8 mmol) before addition to the reaction mixture above. The reaction mixture was stirred at 50 °C for 6 hrs and then was washed with aq NaHCO<sub>3</sub> (50 mL). Drying over anhydrous Na<sub>2</sub>SO<sub>4</sub> and removal of solvent in *vacuo* gave the crude product which was recrystallised from methanol and further purified by flash column chromatography (silica gel as the stationary phase) using hexane/ethyl acetate (2:1 v/v) as the eluent to give pure **5b** as yellow solid. Yield: 0.23 g, 46%. <sup>1</sup>H NMR (300 MHz, CDCl<sub>3</sub>) δ 10.35 (s, 1H), 10.22 (s, 1H), 10.10 (s, 1H), 9.86 (s, 1H), 8.82 (d, 1H, *J* = 8.2), 8.61 (d, 1H, *J* = 1.7), 8.43 (m, 2H), 7.91 (d, 1H, *J* = 3.3), 7.68 (d, 1H, *J* = 4.7), 7.59 (d, 1H, *J* = 1.7), 7.47 (d, 1H, *J* = 3.3), 7.39 (m, 2H), 7.20 (m, 1H), 4.64 (m, 1H), 4.05 (s, 3H), 4.04 (m, 2H), 3.97 (s, 3H), 3.94 (s, 3H), 3.90 (s, 3H), 3.86 (s, 3H), 3.84 (s, 3H), 2.45 (s, 3H), 1.79 (m, 2H), 1.47 (s, 6H), 1.37 (m, 2H), 1.28 (m, 8H), 0.86 (m, 3H). <sup>13</sup>C NMR (75 MHz, CDCl<sub>3</sub>) δ 165.61, 163.24, 162.89, 162.75, 161.41, 156.32, 155.18, 154.18, 149.32, 145.14, 144.67, 144.32, 140.98, 140.80, 135.88, 133.12, 132.94, 131.61, 129.76, 126.83, 126.78, 126.61, 126.24, 126.10, 125.40, 124.72, 124.38, 123.33, 122.27, 119.88, 116.22, 113.02, 112.27, 111.89, 111.61, 110.91, 71.56, 70.74, 68.64, 64.45, 63.14, 62.27, 31.76, 29.62, 29.27, 29.17, 25.95, 22.60, 21.98, 21.70, 21.30, 14.01. HRMS-ESI: calculated for [M+Na]<sup>+</sup> (C<sub>56</sub>H<sub>67</sub>N<sub>5</sub>O<sub>16</sub>Na): *m/z* 1088.4755 found: *m/z* 1088.4750.

**Compound 5c: 4b** (0.20 g, 0.24 mmol) was reduced by catalytic hydrogenation in THF (10 mL) at 50 °C, using Pd-C (0.040 g, 20%) as the catalyst for 3 h. The reaction mixture was then filtered and the solvent removed in *vacuo* to give the pure amine which was immediately used for the next coupling. Acid **1q** (0.10 g, 0.47 mmol) was placed in a *very* dry round bottom flask and saturated with nitrogen gas. Freshly-prepared dry CH<sub>2</sub>Cl<sub>2</sub> (5 mL) and DMF (20 µL) were added to the acid, followed by dropwise addition of oxalyl chloride (0.060 mL, 0.50 mmol). The reaction mixture was allowed to stir for 4 hrs. The solvent was then removed in *vacuo* and saturated with nitrogen gas before addition of 10 mL dry CH<sub>2</sub>Cl<sub>2</sub>. The above amine (0.19 g, 0.24 mmol) was dissolved in 5 mL dry CH<sub>2</sub>Cl<sub>2</sub> and triethylamine (0.20 mL, 1.40 mmol) before addition to the reaction mixture above. The reaction mixture was stirred at 50 °C for 6 hrs and then was washed with aq NaHCO<sub>3</sub> (20 mL). Drying over anhydrous Na<sub>2</sub>SO<sub>4</sub> and removal of solvent in *vacuo* gave the crude product which was recrystallised from methanol and further purified by flash column chromatography (silica gel as the stationary phase) using hexane/ethyl acetate (2:1 v/v) as the eluent to give pure **5c** as yellow solid. Yield: 0.12 g, 49%. <sup>1</sup>H NMR (500 MHz, CDCl<sub>3</sub>) δ 10.28 (s, 1H), 10.21 (s, 1H), 9.95 (s, 1H), 9.84 (s, 1H), 8.83 (d, 1H, *J* = 8.2), 8.79 (m, 3H), 7.92 (d, 1H, *J* = 3.1), 7.90 (m, 3H), 7.61 (d, 1H, *J* = 7.9), 7.49 (d, 1H, *J* = 3.1), 7.40 (m, 3H), 7.20 (m, 1H), 4.65 (m, 1H), 4.06 (s, 3H), 4.02 (s, 6H), 3.96 (s, 3H), 3.89 (s, 3H), 3.88 (s, 3H), 1.38 (s, 6H). <sup>1</sup>H NMR (500 MHz, CDCl<sub>3</sub>) δ 10.35 (s, 1H), 10.10 (s, 2H), 9.85 (s, 1H), 8.83 (d, 1H, *J* = 8.2), 8.60 (d, 1H, *J* = 1.7), 8.43 (m, 2H), 8.22 (d, 1H, *J* = 3.3), 7.79 (d, 1H, *J* = 4.7), 7.68 (d, 1H, *J* = 1.7), 7.60 (d, 1H, *J* = 3.3), 7.39 (m, 2H), 7.21 (m, 1H), 4.65 (m, 1H), 4.08 (s, 3H), 4.04 (m, 2H), 3.97 (s, 3H), 3.95 (s, 3H), 3.90 (s, 3H), 3.87 (s, 3H), 3.85 (s, 3H), 2.46 (s, 3H), 2.44 (s, 3H), 1.79 (m, 2H), 1.47 (s, 6H), 1.37 (m, 2H), 1.28 (m, 8H), 0.87 (m, 3H). <sup>13</sup>C NMR (75 MHz, CDCl<sub>3</sub>) δ 165.60, 163.26, 162.88, 162.74, 161.65, 156.28, 155.12, 149.29, 149.05, 145.10, 143.82, 140.94, 140.78, 136.78, 135.87, 135.52, 133.09, 132.90, 131.58, 129.24, 129.03, 128.91, 128.81, 128.69, 128.51, 128.34, 126.81, 126.69, 126.51, 128.33, 126.81, 126.70, 126.52, 126.12, 125.45, 124.72, 124.40, 123.25, 113.00, 112.20, 111.57, 110.83, 70.69, 68.59, 64.33, 63.16, 62.29, 52.11, 31.76, 29.62, 29.27, 29.18, 25.94, 22.60, 21.96, 21.33, 20.64, 14.04. HRMS-ESI: calculated for [M]<sup>+</sup> (C<sub>54</sub>H<sub>62</sub>N<sub>5</sub>O<sub>15</sub>): *m/z* 1020.4242 found: *m/z* 1020.4203.

**Compound 2g: 1t** (4.00 g, 18.9 mmol) was reduced by catalytic hydrogenation in THF (100 mL) at 50 °C for 3 h. The resulting amine was dissolved in CH<sub>2</sub>Cl<sub>2</sub> (100 mL) was immediately used for the next coupling. Acid **1m** (6.00 g, 23.5 mmol) was dissolved in CH<sub>2</sub>Cl<sub>2</sub> (150 mL) to which NMM (3.60 mL, 28.6 mmol) and ethyl chloroformate (3.20 mL, 26.0 mmol) was added at 0 °C. The reaction mixture was stirred for at least 15 min then a solution of the above amine was added. The reaction mixture was allowed to stir continuously overnight at room temperature. The reaction mixture was washed with 1M KHSO<sub>4</sub> (200 mL), followed by saturated NaHCO<sub>3</sub> (200 mL) and saturated NaCl (200 mL). Drying over Na<sub>2</sub>SO<sub>4</sub> and removal of solvent in *vacuo* gave the crude product, which was recrystallized from methanol to give the pure product **2g**. Yield: 4.91 g, 62%. <sup>1</sup>H NMR (300 MHz, CDCl<sub>3</sub>) δ 10.48 (s, 1H), 8.79 (d, 1H, *J* = 8.2), 7.93 (d, 1H, *J* = 3.2), 7.62 (d, 1H, *J* = 7.8), 7.47 (d, 1H, *J* = 3.2), 7.24 (m, 1H), 4.65 (m, 1H), 4.60 (s, 3H), 4.02 (s, 3H), 3.94 (s, 3H), 1.37 (s, 6H). <sup>13</sup>C NMR (75 MHz, CDCl<sub>3</sub>) δ 165.80, 161.20, 153.98, 149.41, 144.47, 132.73, 129.59, 126.46, 124.51, 124.20, 123.50, 122.30, 116.13, 71.46, 64.51, 62.51, 52.28, 21.71. HRMS-ESI: calculated for [M+Na]<sup>+</sup> (C<sub>20</sub>H<sub>22</sub>N<sub>2</sub>O<sub>8</sub>Na): *m/z* 440.1190 found: *m/z* 440.1194.

**Compound 3f:** **2g** (2.70 g, 6.45 mmol) was reduced by catalytic hydrogenation in THF (80 mL) at 50 °C for 3 h. The resulting amine dissolved in CH<sub>2</sub>Cl<sub>2</sub> (80 mL) was immediately used for the next coupling. Acid **11** (2.50 g, 7.69 mmol) was dissolved in CH<sub>2</sub>Cl<sub>2</sub> (70 mL) to which NMM (1.24 mL, 10.1 mmol) and ethyl chloroformate (1.00 mL, 8.45 mmol) was added at 0 °C. The reaction mixture was stirred for at least 15 min then a solution of the above amine was added. The reaction mixture was allowed to stir continuously overnight at 50 °C. The reaction mixture was washed with 1M KHSO<sub>4</sub> (60 mL), followed by saturated NaHCO<sub>3</sub> (60 mL) and saturated NaCl (60 mL). Drying over Na<sub>2</sub>SO<sub>4</sub> and removal of solvent in *vacuo* gave the crude product, which was recrystallized from methanol to give the pure product **3f**. Yield: 3.70 g, 83%. <sup>1</sup>H NMR (300 MHz, CDCl<sub>3</sub>) δ 10.65 (s, 1H), 10.42 (s, 1H), 8.84 (d, 1H, *J* = 3.2), 8.50 (d, 1H, *J* = 3.2), 8.01 (d, 1H, *J* = 3.2), 7.61 (d, 1H, *J* = 8.0), 7.39 (d, 1H, *J* = 3.2), 7.23 (m, 1H), 7.11 (d, 1H, *J* = 2.9), 7.24 (m, 1H), 4.65 (m, 1H), 4.06 (s, 3H), 4.61 (m, 2H), 4.04 (m, 2H), 3.94 (s, 6H), 3.91 (s, 3H), 3.89 (s, 3H), 1.85 (m, 2H), 1.56 (s, 6H), 1.43 (m, 8H), 1.27 (m, 2H), 0.85 (m, 3H). <sup>13</sup>C NMR (75 MHz, CDCl<sub>3</sub>) δ 165.91, 162.64, 161.24, 155.29, 155.02, 149.21, 144.62, 144.45, 140.93, 133.05, 132.64, 129.44, 126.70, 126.13, 124.52, 124.35, 123.43, 121.25, 115.12, 112.28, 112.53, 70.72, 69.29, 64.52, 63.33, 62.45, 52.32, 50.77, 31.73, 29.64, 29.18, 29.14, 28.87, 25.83, 22.59, 21.95, 14.08. HRMS-ESI: calculated for [M+Na]<sup>+</sup> (C<sub>36</sub>H<sub>45</sub>N<sub>3</sub>O<sub>11</sub>Na): *m/z* 719.2846 found: *m/z* 719.2980.

**Compound 3g:** **3f** (0.38 g, 0.54 mmol) was dissolved in hot methanol (10 mL) to which 1M KOH (1.37 mL, 1.37 mmol) and KCl (0.14 g, 1.82 mmol) was added. The mixture was heated under reflux for 2 h and then quenched with water (20 mL). The aqueous layer was neutralized by addition of 1M HCl (2.0 mL) until the pH was at least 1. The precipitated crude product was collected by filtration, which was recrystallized from hot methanol to give a pure white solid **3g**. Yield: 0.34 g, 93%. <sup>1</sup>H NMR (500 MHz, CDCl<sub>3</sub>) δ 10.45 (s, 3H), 10.30 (s, 3H), 8.55 (d, 1H, *J* = 7.6), 7.96 (d, 1H, *J* = 3.2), 7.65 (d, 1H, *J* = 3.2), 7.57 (d, 1H, *J* = 3.2), 7.50 (d, 1H, *J* = 7.6), 7.25 (d, 1H, *J* = 3.2), 7.22 (m, 1H), 4.61 (m, 1H), 4.08 (s, 3H), 4.07 (m, 2H), 4.01 (s, 3H), 3.85 (s, 6H), 4.03 (s, 3H), 1.73 (s, 6H), 1.41 (m, 2H), 1.31 (m, 8H), 1.28 (m, 2H), 0.84 (m, 3H). <sup>13</sup>C NMR (75 MHz, DMSO-*d*<sub>6</sub>) δ 166.81, 162.94, 162.52, 154.26, 153.47, 149.22, 144.48, 143.27, 142.76, 132.52, 132.31, 127.38, 125.87, 125.23, 124.32, 123.80, 120.1, 114.36, 112.32, 112.08, 70.15, 68.85, 64.07, 62.86, 62.23, 31.25, 28.67, 28.39, 25.47, 22.10, 21.75, 13.95. HRMS-ESI: calculated for [M+Na]<sup>+</sup> (C<sub>35</sub>H<sub>43</sub>N<sub>3</sub>O<sub>11</sub>Na): *m/z* 704.2790 found: *m/z* 704.2801.

**Compound 6b:** Compound **3a** (0.20 g, 0.39 mmol) was reduced by catalytic hydrogenation in THF (15 mL) at 50 °C, using Pd-C (0.040 g, 20%) as the catalyst for 3 h. The reaction mixture was then filtered and the solvent removed in *vacuo* to give the pure amine which was immediately used for the next coupling. Acid **3g** (0.30 g, 0.44 mmol) was placed in a *very* dry round bottom flask and saturated with nitrogen gas. Freshly-prepared dry CH<sub>2</sub>Cl<sub>2</sub> (5 mL) and DMF (27 μL) were added to the acid, followed by dropwise addition of oxalyl chloride (67 μL, 0.53 mmol). The reaction mixture was allowed to stir for 4 hrs. The solvent was then removed in *vacuo* and saturated with nitrogen gas before addition of 10 mL dry CH<sub>2</sub>Cl<sub>2</sub>. The above amine (0.17 g, 0.36 mmol) was dissolved in 10 mL dry CH<sub>2</sub>Cl<sub>2</sub> and triethylamine (0.10 mL, 0.69 mmol) before addition to the reaction mixture above. The reaction mixture was stirred at 50 °C for 6 hrs and then was washed with aq NaHCO<sub>3</sub> (50 mL). Drying over anhydrous Na<sub>2</sub>SO<sub>4</sub> and removal of solvent in *vacuo* gave the crude product which was recrystallised from methanol and further purified by flash column chromatography

(silica gel as the stationary phase) using CH<sub>2</sub>Cl<sub>2</sub>/CH<sub>3</sub>CN (20:1 v/v) as the eluent to give pure product **6b** as a white solid. Yield: 25 mg, 6%. <sup>1</sup>H NMR (500 MHz, CDCl<sub>3</sub>) δ 10.20 (s, 2H), 10.12 (s, 1H), 10.09 (s, 1H), 10.08 (s, 1H), 9.82 (s, 1H), 8.65 (m, 2H), 8.61 (m, 2H), 8.26 (d, 1H, *J* = 3.2), 7.74 (m, 2H), 7.68 (d, 1H, *J* = 7.8), 7.62 (d, 1H, *J* = 3.2), 7.31 (d, 1H, *J* = 7.8), 7.21 (m, 3H), 7.16 (d, 1H, *J* = 3.2), 6.95 (t, 1H), 4.49 (m, 1H), 3.90 (s, 3H), 3.89 (s, 3H), 3.88 (s, 3H), 3.83 (s, 3H), 3.78 (s, 3H), 3.63 (s, 3H), 3.61 (s, 3H), 1.66 (m, 2H), 1.46 (s, 6H), 1.29 (m, 8H), 1.13 (m, 2H), 0.63 (m, 3H). <sup>13</sup>C NMR (125 MHz, CDCl<sub>3</sub>) δ 165.22, 163.26, 162.83, 162.74, 161.11, 155.22, 155.14, 149.00, 147.26, 147.18, 147.02, 144.32, 144.04, 140.80, 133.09, 132.77, 132.41, 132.16, 129.32, 126.68, 126.58, 126.48, 126.38, 126.28, 126.06, 125.90, 125.86, 125.76, 125.26, 124.87, 124.78, 124.58, 124.25, 122.99, 121.34, 114.71, 112.83, 112.51, 70.73, 69.19, 64.45, 63.34, 63.00, 62.91, 62.13, 53.14, 50.70, 31.70, 29.61, 29.17, 29.11, 28.87, 25.84, 22.56, 21.91, 14.00. HRMS-ESI: calculated for [M+Na]<sup>+</sup> (C<sub>41</sub>H<sub>37</sub>N<sub>3</sub>O<sub>13</sub>Na): *m/z* 1165.4377 found: *m/z* 1165.4356.

**Compound 5d: 4a** (0.50 g, 0.734 mmol) was reduced by catalytic hydrogenation in THF (20 mL) at 50 °C, using Pd-C (0.14 g, 20%) as the catalyst for 3 h. The reaction mixture was then filtered and the solvent removed in *vacuo* to give the pure amine which was immediately used for the next coupling. Acid **1m** (0.40 g, 1.56 mmol) was placed in a *very* dry round bottom flask and saturated with nitrogen gas. Freshly-prepared dry CH<sub>2</sub>Cl<sub>2</sub> (10 mL) and DMF (0.10 mL) were added to the acid, followed by dropwise addition of oxalyl chloride (0.20 mL, 1.60 mmol). The reaction mixture was allowed to stir for 4 hrs. The solvent was then removed in *vacuo* and saturated with nitrogen gas before addition of 10 mL dry CH<sub>2</sub>Cl<sub>2</sub>. The above amine (0.48 g, 0.73 mmol) was dissolved in 10 mL dry CH<sub>2</sub>Cl<sub>2</sub> and triethylamine (0.30 mL, 2.10 mmol) before addition to the reaction mixture above. The reaction mixture was stirred at 50 °C for 6 hrs and then was washed with aq NaHCO<sub>3</sub> (40 mL). Drying over anhydrous Na<sub>2</sub>SO<sub>4</sub> and removal of solvent in *vacuo* gave the crude product which was recrystallised from methanol and further purified by flash column chromatography (silica gel as the stationary phase) using hexane/ethyl acetate (2:1 v/v) as the eluent to give pure **5d** as yellow solid. Yield: 0.33 g, 52%. <sup>1</sup>H NMR (500 MHz, CDCl<sub>3</sub>) δ 10.28 (s, 1H), 10.21 (s, 1H), 9.95 (s, 1H), 9.84 (s, 1H), 8.83 (d, 1H, *J* = 8.2), 8.79 (m, 3H), 7.92 (d, 1H, *J* = 3.1), 7.90 (m, 3H), 7.61 (d, 1H, *J* = 7.9), 7.49 (d, 1H, *J* = 3.1), 7.40 (m, 3H), 7.20 (m, 1H), 4.65 (m, 1H), 4.06 (s, 3H), 4.02 (s, 6H), 3.96 (s, 3H), 3.89 (s, 3H), 3.88 (s, 3H), 1.38 (s, 6H). <sup>13</sup>C NMR (75 MHz, CDCl<sub>3</sub>) δ 165.64, 163.17, 163.08, 162.88, 161.45, 154.19, 149.27, 147.29, 147.20, 144.65, 144.28, 133.04, 132.20, 132.02, 126.82, 126.66, 126.52, 126.39, 126.17, 125.87, 125.73, 125.09, 124.93, 124.84, 124.73, 124.44, 123.29, 122.36, 116.23, 71.54, 64.54, 63.21, 63.03, 62.36, 52.16, 29.65, 21.71. HRMS-ESI: calculated for [M+Na]<sup>+</sup> (C<sub>44</sub>H<sub>43</sub>N<sub>5</sub>O<sub>14</sub>Na): *m/z* 888.2699 found: *m/z* 888.2723.

**Compound 6c: 5d** (0.10 g, 0.12 mmol) was reduced by catalytic hydrogenation in THF (5 mL) at 40 °C, using Pd-C (0.020 g, 20%) as the catalyst for 3 h. The reaction mixture was then filtered and the solvent removed in *vacuo* to give the pure amine which was immediately used for the next coupling. Acid **1q** (0.15 g, 0.71 mmol) was placed in a *very* dry round bottom flask and saturated with nitrogen gas. Freshly-prepared dry CH<sub>2</sub>Cl<sub>2</sub> (4 mL) and DMF (32 μL) were added to the acid, followed by dropwise addition of oxalyl chloride (0.080 mL, 0.63 mmol). The reaction mixture was allowed to stir for 4 hrs. The solvent was then removed in *vacuo* and saturated with nitrogen gas before addition of 10 mL dry CH<sub>2</sub>Cl<sub>2</sub>. The above amine (0.090 g, 0.12 mmol) was dissolved in 5 mL dry CH<sub>2</sub>Cl<sub>2</sub> and triethylamine (0.060 mL, 0.42 mmol) before



addition to the reaction mixture above. The reaction mixture was stirred at 50 °C for 6 hrs and then was washed with aq NaHCO<sub>3</sub> (10 mL). Drying over anhydrous Na<sub>2</sub>SO<sub>4</sub> and removal of solvent in *vacuo* gave the crude product which was recrystallised from methanol and further purified by flash column chromatography (silica gel as the stationary phase) using hexane/ethyl acetate (1.5:1 v/v) as the eluent to give pure **6c** as white solid. Yield: 38 mg, 31%. <sup>1</sup>H NMR (300 MHz, CDCl<sub>3</sub>) δ 10.28 (s, 1H), 10.25 (s, 1H), 10.15 (s, 1H), 10.14 (s, 1H), 9.85 (s, 1H), 8.83 (m, 2H), 8.81 (m, 2H), 8.46 (d, 1H, *J* = 3.2), 8.15 (d, 1H, *J* = 1.9), 7.94 (m, 3H), 7.68 (d, 1H, *J* = 1.9), 7.54 (d, 1H, *J* = 1.9), 7.52 (d, 1H, *J* = 1.9), 7.45 (m, 3H), 7.18 (m, 1H), 4.71 (m, 1H), 4.15 (s, 3H), 4.14 (s, 3H), 4.07 (s, 3H), 4.06 (s, 3H), 4.05 (s, 3H), 4.00 (s, 3H), 3.82 (s, 3H), 2.06 (s, 3H), 1.42 (s, 6H). <sup>13</sup>C NMR (75 MHz, CDCl<sub>3</sub>) δ 165.26, 163.29, 162.87, 162.79, 161.40, 155.17, 149.04, 148.73, 147.19, 147.04, 143.69, 140.77, 136.74, 135.61, 133.13, 132.80, 132.42, 132.33, 132.16, 129.01, 128.36, 126.72, 126.62, 126.51, 126.43, 126.31, 126.07, 125.92, 125.81, 125.30, 124.89, 124.82, 124.61, 124.24, 123.06, 112.85, 112.44, 70.72, 64.33, 63.36, 63.04, 62.94, 62.19, 60.33, 52.18, 29.64, 21.94, 20.98, 20.64, 14.14. HRMS-ESI: calculated for [M]<sup>+</sup> (C<sub>53</sub>H<sub>51</sub>N<sub>6</sub>O<sub>16</sub>): *m/z* 1027.3366 found: *m/z* 1027.3362.

**Amide Hydrogen-Deuterium Exchange Experiments:** Solutions of oligomers (5 mM) were prepared by dissolving the compounds in 50% DMSO-*d*<sub>6</sub> in CDCl<sub>3</sub> (total volume: 0.95 mL) and the spectra were recorded at room temperature as the reference spectra at *t* = 0. The H-D exchange experiment was initiated by adding 0.05 mL of D<sub>2</sub>O into the samples, which resulted in a solution in a mixed solvent of D<sub>2</sub>O/DMSO-*d*<sub>6</sub>/CDCl<sub>3</sub> (2:19:19 v/v). The resultant spectra were then recorded (500 MHz) at appropriate time intervals, based on which the time dependent peak areas of the amide protons were obtained and fitted into the pseudo-first-order reaction rate equation of  $(I_t - I)/(I_0 - I_\infty) = e^{-kt}$ , where *I<sub>t</sub>*, *I*, and *I<sub>0</sub>*, correspond to the integrated area of the corresponding proton at *t* = *t*, *t* = ∞, *t* = 0; *k* is the decayrate constant. The half-life *T*<sub>1/2</sub> is related to *k* by *T*<sub>1/2</sub> = ln2/*k*. Thus, the half-life *T*<sub>1/2</sub> was obtained by fitting the time-dependent peak areas into the above equation  $[(I_t - I_\infty)/(I_0 - I_\infty) = e^{-kt}]$  with Origin 7.7 program.

**Table S1.** Chemical shifts (ppm)<sup>a</sup> and the half-lives (hrs, in parenthesis) of H-D exchange<sup>b</sup> of amide protons.

| oligomer  | H <sub>6</sub>  | H <sub>11</sub> | H <sub>16</sub> | H <sub>21</sub> | H <sub>26</sub> |
|-----------|-----------------|-----------------|-----------------|-----------------|-----------------|
| <b>2a</b> | 10.36<br>(0.13) |                 |                 |                 |                 |
| <b>2b</b> | 10.37<br>(0.20) |                 |                 |                 |                 |
| <b>2c</b> | 10.47<br>(0.90) |                 |                 |                 |                 |
| <b>2d</b> | 10.25<br>(0.24) |                 |                 |                 |                 |
| <b>2e</b> | 10.49<br>(0.56) |                 |                 |                 |                 |
| <b>2f</b> | 10.24<br>(0.30) | 8.70<br>(0.21)  |                 |                 |                 |
| <b>2g</b> | 10.49<br>(0.83) |                 |                 |                 |                 |
| <b>3a</b> | 10.21<br>(0.04) | 10.23<br>(0.27) |                 |                 |                 |
| <b>3b</b> | 10.24<br>(0.05) | 10.37<br>(0.24) |                 |                 |                 |
| <b>3c</b> | 10.35<br>(0.08) | 10.38<br>(1.34) |                 |                 |                 |
| <b>3d</b> | 10.36<br>(0.11) | 10.38<br>(0.65) |                 |                 |                 |
| <b>3e</b> | 10.35<br>(0.07) | 10.36<br>(0.90) |                 |                 |                 |
| <b>3f</b> | 10.33<br>(0.05) | 10.35<br>(0.72) |                 |                 |                 |
| <b>4a</b> | 10.20<br>(0.63) | 10.10<br>(0.03) | 10.00<br>(0.06) |                 |                 |
| <b>4b</b> | 10.33<br>(0.92) | 10.14<br>(0.11) | 10.10<br>(0.08) |                 |                 |
| <b>5a</b> | 10.25<br>(0.33) | 9.85<br>(0.05)  | 9.85<br>(0.20)  | 10.25<br>(0.27) |                 |
| <b>5b</b> | 10.35<br>(1.90) | 9.85<br>(0.07)  | 9.65<br>(0.28)  | 10.25<br>(0.37) |                 |
| <b>5c</b> | 10.35<br>(1.25) | 10.10<br>(0.08) | 9.85<br>(0.24)  | 10.10<br>(0.32) |                 |
| <b>5d</b> | 10.28<br>(0.14) | 10.21<br>(0.09) | 9.95<br>(0.09)  | 9.84<br>(0.21)  |                 |
| <b>6a</b> | 10.19<br>(0.07) | 10.12<br>(0.09) | 9.84<br>(0.06)  | 10.28<br>(0.11) | 10.15<br>(0.38) |
| <b>6b</b> | 10.12<br>(0.42) | 10.08<br>(0.29) | 9.81<br>(0.27)  | 10.21<br>(0.40) | 10.09<br>(5.79) |
| <b>6c</b> | 10.28<br>(0.21) | 10.25<br>(0.17) | 10.15<br>(0.21) | 10.15<br>(0.40) | 9.85<br>(1.20)  |

<sup>a</sup> Chemical shifts were measured at 1 mM in CDCl<sub>3</sub> (500MHz) at room temperature. <sup>b</sup> Half-lives of H-D exchange data in parenthesis were measured at 5 mM in 5% D<sub>2</sub>O/47.5% DMSO-*d*<sub>6</sub> (v:v) in CDCl<sub>3</sub> at room temperature.

d)

**Ab Initio Molecular Modelling:** All the calculations were carried out by utilizing the Gaussian03 program package.<sup>1</sup> The geometry optimizations were performed at the density functional theory (DFT) level, and the Becke's three parameter hybrid functional with the Lee-Yang-Parr correlation functional (B3LYP)<sup>2</sup> method was employed to do the calculations. The 6-31G\*<sup>3,4</sup> basis from the Gaussian basis set library has been used in all the calculations. All the trimers and hexamers were relaxed fully without any symmetry constraints. The harmonic vibrational frequencies and zero-point energy corrections were calculated at the same level of theory. Single point energy were obtained at the B3LYP level in conjunction with the 6-311+G(2d,p) basis set with use of the above optimized geometries, i.e., B3LYP/6-311+G(2d,p)//B3LYP/6-31G(d).

**Determination of Crystal Structures:** Data were collected on a Bruker APEX diffractometer with a CCD detector and graphite-monochromated MoK $\alpha$  radiation using a sealed tube (2.4 kW) at 223(2) K. Absorption corrections were made with the program SADABS<sup>5</sup> and the crystallographic package SHELXTL<sup>6</sup> was used for all calculations. In the final least-squares refinement cycles on  $|F|^2$ , the model converged at  $R1 = 0.1335$ ,  $wR2 = 0.1924$ ,  $GoF = 1.081$  for 6245 ( $I \geq 2\sigma(I)$ ) reflections.

1. Frisch, M. J. In *Gaussian 03, Gaussian, Inc.*; Wallingford CT,, 2004.
2. Becke, A. D. *J. Chem. Phys.* 1993, 98, 5648.
3. Petersson, G. A.; Bennett, A.; Tensfeldt, T. G.; Al-Laham, M. A.; Shirley, W. A.; Mantzaris, J. *J. Chem. Phys.* 1988, 89, 2193.
4. Petersson, G. A.; Al-Laham, M. A. *J. Chem. Phys.* 1991, 94, 6081.
5. Sheldrick, G. M.; *SADABS Software for Empirical Absorption Corrections, University of Göttingen (Germany), 2000.*
6. *SHELXTL Reference Manual, version 5.1, Bruker AXS, Analytical X-Ray Systems, Madison, WI, USA, 1997.*

## X-Ray Crystal Data

### Crystal data and structure refinement for **1c**

|                                   |                                                |                   |
|-----------------------------------|------------------------------------------------|-------------------|
| Identification code               | 7098                                           |                   |
| Empirical formula                 | C <sub>16</sub> H <sub>24</sub> O <sub>4</sub> |                   |
| Formula weight                    | 280.35                                         |                   |
| Temperature                       | 223(2) K                                       |                   |
| Wavelength                        | 0.71073 Å                                      |                   |
| Crystal system                    | Triclinic                                      |                   |
| Space group                       | P-1                                            |                   |
| Unit cell dimensions              | a = 9.6816(6) Å                                | α = 84.4210(10)°. |
|                                   | b = 11.8460(7) Å                               | β = 75.4620(10)°. |
|                                   | c = 14.8820(9) Å                               | γ = 68.0090(10)°. |
| Volume                            | 1531.93(16) Å <sup>3</sup>                     |                   |
| Z                                 | 4                                              |                   |
| Density (calculated)              | 1.216 Mg/m <sup>3</sup>                        |                   |
| Absorption coefficient            | 0.086 mm <sup>-1</sup>                         |                   |
| F(000)                            | 608                                            |                   |
| Crystal size                      | 0.60 x 0.50 x 0.14 mm <sup>3</sup>             |                   |
| Theta range for data collection   | 1.41 to 27.50°.                                |                   |
| Index ranges                      | -12 ≤ h ≤ 12, -15 ≤ k ≤ 15, -19 ≤ l ≤ 19       |                   |
| Reflections collected             | 19300                                          |                   |
| Independent reflections           | 7021 [R(int) = 0.0305]                         |                   |
| Completeness to theta = 27.50°    | 99.7 %                                         |                   |
| Absorption correction             | Sadabs, (Sheldrick 2001)                       |                   |
| Max. and min. transmission        | 0.9881 and 0.9503                              |                   |
| Refinement method                 | Full-matrix least-squares on F <sup>2</sup>    |                   |
| Data / restraints / parameters    | 7021 / 0 / 367                                 |                   |
| Goodness-of-fit on F <sup>2</sup> | 1.031                                          |                   |
| Final R indices [I > 2σ(I)]       | R1 = 0.0552, wR2 = 0.1398                      |                   |
| R indices (all data)              | R1 = 0.0690, wR2 = 0.1486                      |                   |
| Largest diff. peak and hole       | 0.349 and -0.220 e.Å <sup>-3</sup>             |                   |

# Crystal data and structure refinement for **2a**

|                                   |                                             |                             |
|-----------------------------------|---------------------------------------------|-----------------------------|
| Identification code               | 8008                                        |                             |
| Empirical formula                 | C17 H16 N2 O7                               |                             |
| Formula weight                    | 360.32                                      |                             |
| Temperature                       | 223(2) K                                    |                             |
| Wavelength                        | 0.71073 Å                                   |                             |
| Crystal system                    | Monoclinic                                  |                             |
| Space group                       | P2(1)/c                                     |                             |
| Unit cell dimensions              | a = 6.9923(4) Å                             | $\alpha = 90^\circ$ .       |
|                                   | b = 28.3844(18) Å                           | $\beta = 91.323(2)^\circ$ . |
|                                   | c = 8.1995(5) Å                             | $\gamma = 90^\circ$ .       |
| Volume                            | 1626.94(17) Å <sup>3</sup>                  |                             |
| Z                                 | 4                                           |                             |
| Density (calculated)              | 1.471 Mg/m <sup>3</sup>                     |                             |
| Absorption coefficient            | 0.116 mm <sup>-1</sup>                      |                             |
| F(000)                            | 752                                         |                             |
| Crystal size                      | 0.60 x 0.30 x 0.16 mm <sup>3</sup>          |                             |
| Theta range for data collection   | 1.43 to 27.43°.                             |                             |
| Index ranges                      | -8 ≤ h ≤ 9, -36 ≤ k ≤ 36, -10 ≤ l ≤ 6       |                             |
| Reflections collected             | 11350                                       |                             |
| Independent reflections           | 3708 [R(int) = 0.0252]                      |                             |
| Completeness to theta = 27.43°    | 99.9 %                                      |                             |
| Absorption correction             | Sadabs, (Sheldrick 2001)                    |                             |
| Max. and min. transmission        | 0.9817 and 0.9336                           |                             |
| Refinement method                 | Full-matrix least-squares on F <sup>2</sup> |                             |
| Data / restraints / parameters    | 3708 / 0 / 242                              |                             |
| Goodness-of-fit on F <sup>2</sup> | 1.065                                       |                             |
| Final R indices [I > 2σ(I)]       | R1 = 0.0491, wR2 = 0.1314                   |                             |
| R indices (all data)              | R1 = 0.0620, wR2 = 0.1391                   |                             |
| Largest diff. peak and hole       | 0.337 and -0.211 e.Å <sup>-3</sup>          |                             |

# Crystal data and structure refinement for **2b**

|                                   |                                                               |                   |
|-----------------------------------|---------------------------------------------------------------|-------------------|
| Identification code               | 9177                                                          |                   |
| Empirical formula                 | C <sub>18</sub> H <sub>18</sub> N <sub>2</sub> O <sub>8</sub> |                   |
| Formula weight                    | 390.34                                                        |                   |
| Temperature                       | 223(2) K                                                      |                   |
| Wavelength                        | 0.71073 Å                                                     |                   |
| Crystal system                    | Monoclinic                                                    |                   |
| Space group                       | P2(1)/c                                                       |                   |
| Unit cell dimensions              | a = 11.1282(4) Å                                              | α = 90°.          |
|                                   | b = 25.3958(10) Å                                             | β = 93.9020(10)°. |
|                                   | c = 12.4272(5) Å                                              | γ = 90°.          |
| Volume                            | 3503.9(2) Å <sup>3</sup>                                      |                   |
| Z                                 | 8                                                             |                   |
| Density (calculated)              | 1.480 Mg/m <sup>3</sup>                                       |                   |
| Absorption coefficient            | 0.118 mm <sup>-1</sup>                                        |                   |
| F(000)                            | 1632                                                          |                   |
| Crystal size                      | 0.58 x 0.34 x 0.12 mm <sup>3</sup>                            |                   |
| Theta range for data collection   | 1.83 to 27.50°.                                               |                   |
| Index ranges                      | -10 ≤ h ≤ 14, -32 ≤ k ≤ 32, -16 ≤ l ≤ 14                      |                   |
| Reflections collected             | 24761                                                         |                   |
| Independent reflections           | 8027 [R(int) = 0.0234]                                        |                   |
| Completeness to theta = 27.50°    | 99.9 %                                                        |                   |
| Absorption correction             | Semi-empirical from equivalents                               |                   |
| Max. and min. transmission        | 0.9860 and 0.9346                                             |                   |
| Refinement method                 | Full-matrix least-squares on F <sup>2</sup>                   |                   |
| Data / restraints / parameters    | 8027 / 5 / 539                                                |                   |
| Goodness-of-fit on F <sup>2</sup> | 1.050                                                         |                   |
| Final R indices [I > 2σ(I)]       | R1 = 0.0457, wR2 = 0.1235                                     |                   |
| R indices (all data)              | R1 = 0.0548, wR2 = 0.1303                                     |                   |
| Largest diff. peak and hole       | 0.322 and -0.246 e.Å <sup>-3</sup>                            |                   |

# Crystal data and structure refinement for **2c**

|                                   |                                                               |                 |
|-----------------------------------|---------------------------------------------------------------|-----------------|
| Identification code               | 9180                                                          |                 |
| Empirical formula                 | C <sub>25</sub> H <sub>32</sub> N <sub>2</sub> O <sub>8</sub> |                 |
| Formula weight                    | 488.53                                                        |                 |
| Temperature                       | 293(2) K                                                      |                 |
| Wavelength                        | 0.71073 Å                                                     |                 |
| Crystal system                    | Triclinic                                                     |                 |
| Space group                       | P-1                                                           |                 |
| Unit cell dimensions              | a = 8.6807(5) Å                                               | α = 80.749(2)°. |
|                                   | b = 12.2715(8) Å                                              | β = 73.924(2)°. |
|                                   | c = 12.4359(8) Å                                              | γ = 81.848(2)°. |
| Volume                            | 1249.75(14) Å <sup>3</sup>                                    |                 |
| Z                                 | 2                                                             |                 |
| Density (calculated)              | 1.298 Mg/m <sup>3</sup>                                       |                 |
| Absorption coefficient            | 0.097 mm <sup>-1</sup>                                        |                 |
| F(000)                            | 520                                                           |                 |
| Crystal size                      | 0.50 x 0.20 x 0.14 mm <sup>3</sup>                            |                 |
| Theta range for data collection   | 1.69 to 27.50°.                                               |                 |
| Index ranges                      | -11 ≤ h ≤ 10, -15 ≤ k ≤ 14, -16 ≤ l ≤ 12                      |                 |
| Reflections collected             | 8919                                                          |                 |
| Independent reflections           | 5693 [R(int) = 0.0188]                                        |                 |
| Completeness to theta = 27.50°    | 99.3 %                                                        |                 |
| Absorption correction             | Semi-empirical from equivalents                               |                 |
| Max. and min. transmission        | 0.9865 and 0.9531                                             |                 |
| Refinement method                 | Full-matrix least-squares on F <sup>2</sup>                   |                 |
| Data / restraints / parameters    | 5693 / 8 / 346                                                |                 |
| Goodness-of-fit on F <sup>2</sup> | 1.047                                                         |                 |
| Final R indices [I > 2σ(I)]       | R1 = 0.0535, wR2 = 0.1438                                     |                 |
| R indices (all data)              | R1 = 0.0654, wR2 = 0.1525                                     |                 |
| Largest diff. peak and hole       | 0.317 and -0.194 e.Å <sup>-3</sup>                            |                 |

# Crystal data and structure refinement for **2d**

|                                   |                                                               |                  |
|-----------------------------------|---------------------------------------------------------------|------------------|
| Identification code               | 7172                                                          |                  |
| Empirical formula                 | C <sub>19</sub> H <sub>20</sub> N <sub>2</sub> O <sub>9</sub> |                  |
| Formula weight                    | 420.37                                                        |                  |
| Temperature                       | 223(2) K                                                      |                  |
| Wavelength                        | 0.71073 Å                                                     |                  |
| Crystal system                    | Triclinic                                                     |                  |
| Space group                       | P-1                                                           |                  |
| Unit cell dimensions              | a = 7.4376(7) Å                                               | α = 108.302(2)°. |
|                                   | b = 11.7525(11) Å                                             | β = 104.038(2)°. |
|                                   | c = 12.3504(12) Å                                             | γ = 100.220(2)°. |
| Volume                            | 955.90(16) Å <sup>3</sup>                                     |                  |
| Z                                 | 2                                                             |                  |
| Density (calculated)              | 1.460 Mg/m <sup>3</sup>                                       |                  |
| Absorption coefficient            | 0.118 mm <sup>-1</sup>                                        |                  |
| F(000)                            | 440                                                           |                  |
| Crystal size                      | 0.54 x 0.28 x 0.12 mm <sup>3</sup>                            |                  |
| Theta range for data collection   | 1.83 to 27.49°.                                               |                  |
| Index ranges                      | -9 ≤ h ≤ 9, -13 ≤ k ≤ 15, -16 ≤ l ≤ 13                        |                  |
| Reflections collected             | 6786                                                          |                  |
| Independent reflections           | 4383 [R(int) = 0.0250]                                        |                  |
| Completeness to theta = 27.49°    | 99.4 %                                                        |                  |
| Absorption correction             | Sadabs, (Sheldrick 2001)                                      |                  |
| Max. and min. transmission        | 0.9860 and 0.9392                                             |                  |
| Refinement method                 | Full-matrix least-squares on F <sup>2</sup>                   |                  |
| Data / restraints / parameters    | 4383 / 0 / 280                                                |                  |
| Goodness-of-fit on F <sup>2</sup> | 1.048                                                         |                  |
| Final R indices [I > 2σ(I)]       | R <sub>1</sub> = 0.0550, wR <sub>2</sub> = 0.1344             |                  |
| R indices (all data)              | R <sub>1</sub> = 0.0808, wR <sub>2</sub> = 0.1485             |                  |
| Largest diff. peak and hole       | 0.294 and -0.272 e.Å <sup>-3</sup>                            |                  |



# Crystal data and structure refinement for **3a**

|                                   |                                                               |                  |
|-----------------------------------|---------------------------------------------------------------|------------------|
| Identification code               | 8010                                                          |                  |
| Empirical formula                 | C <sub>25</sub> H <sub>23</sub> N <sub>3</sub> O <sub>9</sub> |                  |
| Formula weight                    | 509.46                                                        |                  |
| Temperature                       | 223(2) K                                                      |                  |
| Wavelength                        | 0.71073 Å                                                     |                  |
| Crystal system                    | Monoclinic                                                    |                  |
| Space group                       | P2(1)/n                                                       |                  |
| Unit cell dimensions              | a = 7.0390(6) Å                                               | α = 90°.         |
|                                   | b = 24.783(2) Å                                               | β = 100.260(2)°. |
|                                   | c = 13.5449(12) Å                                             | γ = 90°.         |
| Volume                            | 2325.1(3) Å <sup>3</sup>                                      |                  |
| Z                                 | 4                                                             |                  |
| Density (calculated)              | 1.455 Mg/m <sup>3</sup>                                       |                  |
| Absorption coefficient            | 0.112 mm <sup>-1</sup>                                        |                  |
| F(000)                            | 1064                                                          |                  |
| Crystal size                      | 0.56 x 0.46 x 0.14 mm <sup>3</sup>                            |                  |
| Theta range for data collection   | 1.64 to 27.43°.                                               |                  |
| Index ranges                      | -8 ≤ h ≤ 9, -32 ≤ k ≤ 24, -17 ≤ l ≤ 17                        |                  |
| Reflections collected             | 16262                                                         |                  |
| Independent reflections           | 5293 [R(int) = 0.0307]                                        |                  |
| Completeness to theta = 27.43°    | 99.8 %                                                        |                  |
| Absorption correction             | Sadabs, (Sheldrick 2001)                                      |                  |
| Max. and min. transmission        | 0.9844 and 0.9397                                             |                  |
| Refinement method                 | Full-matrix least-squares on F <sup>2</sup>                   |                  |
| Data / restraints / parameters    | 5293 / 0 / 346                                                |                  |
| Goodness-of-fit on F <sup>2</sup> | 1.062                                                         |                  |
| Final R indices [I > 2σ(I)]       | R1 = 0.0493, wR2 = 0.1259                                     |                  |
| R indices (all data)              | R1 = 0.0671, wR2 = 0.1355                                     |                  |
| Largest diff. peak and hole       | 0.739 and -0.532 e.Å <sup>-3</sup>                            |                  |

# Crystal data and structure refinement for **3b**

|                                   |                                                                |                    |
|-----------------------------------|----------------------------------------------------------------|--------------------|
| Identification code               | 8533                                                           |                    |
| Empirical formula                 | C <sub>27</sub> H <sub>27</sub> N <sub>3</sub> O <sub>11</sub> |                    |
| Formula weight                    | 569.52                                                         |                    |
| Temperature                       | 100(2) K                                                       |                    |
| Wavelength                        | 0.71073 Å                                                      |                    |
| Crystal system                    | Triclinic                                                      |                    |
| Space group                       | P-1                                                            |                    |
| Unit cell dimensions              | a = 7.8202(4) Å                                                | α = 102.7860(10)°. |
|                                   | b = 11.1046(5) Å                                               | β = 93.9600(10)°.  |
|                                   | c = 15.2948(7) Å                                               | γ = 103.0680(10)°. |
| Volume                            | 1251.77(10) Å <sup>3</sup>                                     |                    |
| Z                                 | 2                                                              |                    |
| Density (calculated)              | 1.511 Mg/m <sup>3</sup>                                        |                    |
| Absorption coefficient            | 0.119 mm <sup>-1</sup>                                         |                    |
| F(000)                            | 596                                                            |                    |
| Crystal size                      | 0.60 x 0.30 x 0.20 mm <sup>3</sup>                             |                    |
| Theta range for data collection   | 1.38 to 27.50°.                                                |                    |
| Index ranges                      | -10 ≤ h ≤ 10, -14 ≤ k ≤ 14, -19 ≤ l ≤ 19                       |                    |
| Reflections collected             | 16471                                                          |                    |
| Independent reflections           | 5736 [R(int) = 0.0256]                                         |                    |
| Completeness to theta = 27.50°    | 99.7 %                                                         |                    |
| Absorption correction             | Sadabs, (Sheldrick 2001)                                       |                    |
| Max. and min. transmission        | 0.9766 and 0.9321                                              |                    |
| Refinement method                 | Full-matrix least-squares on F <sup>2</sup>                    |                    |
| Data / restraints / parameters    | 5736 / 0 / 384                                                 |                    |
| Goodness-of-fit on F <sup>2</sup> | 1.038                                                          |                    |
| Final R indices [I > 2σ(I)]       | R1 = 0.0429, wR2 = 0.1146                                      |                    |
| R indices (all data)              | R1 = 0.0469, wR2 = 0.1176                                      |                    |
| Largest diff. peak and hole       | 0.427 and -0.209 e.Å <sup>-3</sup>                             |                    |

# Crystal data and structure refinement for **3c**

|                                   |                                                                |                   |
|-----------------------------------|----------------------------------------------------------------|-------------------|
| Identification code               | 8534                                                           |                   |
| Empirical formula                 | C <sub>28</sub> H <sub>29</sub> N <sub>3</sub> O <sub>12</sub> |                   |
| Formula weight                    | 599.54                                                         |                   |
| Temperature                       | 295(2) K                                                       |                   |
| Wavelength                        | 0.71073 Å                                                      |                   |
| Crystal system                    | Triclinic                                                      |                   |
| Space group                       | P-1                                                            |                   |
| Unit cell dimensions              | a = 7.6819(6) Å                                                | α = 70.1970(10)°. |
|                                   | b = 12.8663(9) Å                                               | β = 84.768(2)°.   |
|                                   | c = 15.3441(11) Å                                              | γ = 76.122(2)°.   |
| Volume                            | 1385.15(18) Å <sup>3</sup>                                     |                   |
| Z                                 | 2                                                              |                   |
| Density (calculated)              | 1.437 Mg/m <sup>3</sup>                                        |                   |
| Absorption coefficient            | 0.114 mm <sup>-1</sup>                                         |                   |
| F(000)                            | 628                                                            |                   |
| Crystal size                      | 0.70 x 0.36 x 0.20 mm <sup>3</sup>                             |                   |
| Theta range for data collection   | 1.41 to 27.50°.                                                |                   |
| Index ranges                      | -9 ≤ h ≤ 9, -16 ≤ k ≤ 16, -19 ≤ l ≤ 19                         |                   |
| Reflections collected             | 18159                                                          |                   |
| Independent reflections           | 6348 [R(int) = 0.0315]                                         |                   |
| Completeness to theta = 27.50°    | 99.9 %                                                         |                   |
| Absorption correction             | Sadabs, (Sheldrick 2001)                                       |                   |
| Max. and min. transmission        | 0.9776 and 0.9245                                              |                   |
| Refinement method                 | Full-matrix least-squares on F <sup>2</sup>                    |                   |
| Data / restraints / parameters    | 6348 / 0 / 403                                                 |                   |
| Goodness-of-fit on F <sup>2</sup> | 1.017                                                          |                   |
| Final R indices [I > 2σ(I)]       | R1 = 0.0559, wR2 = 0.1378                                      |                   |
| R indices (all data)              | R1 = 0.0765, wR2 = 0.1497                                      |                   |
| Largest diff. peak and hole       | 0.284 and -0.249 e.Å <sup>-3</sup>                             |                   |

# Crystal data and structure refinement for **3d**

|                                   |                                             |                              |
|-----------------------------------|---------------------------------------------|------------------------------|
| Identification code               | 7322                                        |                              |
| Empirical formula                 | C35 H43 N3 O12                              |                              |
| Formula weight                    | 697.72                                      |                              |
| Temperature                       | 223(2) K                                    |                              |
| Wavelength                        | 0.71073 Å                                   |                              |
| Crystal system                    | Triclinic                                   |                              |
| Space group                       | P-1                                         |                              |
| Unit cell dimensions              | a = 6.8316(8) Å                             | $\alpha = 83.062(2)^\circ$ . |
|                                   | b = 15.8889(18) Å                           | $\beta = 78.939(3)^\circ$ .  |
|                                   | c = 16.4300(18) Å                           | $\gamma = 87.588(2)^\circ$ . |
| Volume                            | 1737.1(3) Å <sup>3</sup>                    |                              |
| Z                                 | 2                                           |                              |
| Density (calculated)              | 1.334 Mg/m <sup>3</sup>                     |                              |
| Absorption coefficient            | 0.101 mm <sup>-1</sup>                      |                              |
| F(000)                            | 740                                         |                              |
| Crystal size                      | 0.60 x 0.10 x 0.06 mm <sup>3</sup>          |                              |
| Theta range for data collection   | 1.70 to 25.00°.                             |                              |
| Index ranges                      | -8 ≤ h ≤ 8, -18 ≤ k ≤ 18, -19 ≤ l ≤ 19      |                              |
| Reflections collected             | 18541                                       |                              |
| Independent reflections           | 6122 [R(int) = 0.0451]                      |                              |
| Completeness to theta = 25.00°    | 100.0 %                                     |                              |
| Absorption correction             | Sadabs, (Sheldrick 2001)                    |                              |
| Max. and min. transmission        | 0.9940 and 0.9418                           |                              |
| Refinement method                 | Full-matrix least-squares on F <sup>2</sup> |                              |
| Data / restraints / parameters    | 6122 / 0 / 466                              |                              |
| Goodness-of-fit on F <sup>2</sup> | 1.121                                       |                              |
| Final R indices [I > 2σ(I)]       | R1 = 0.0643, wR2 = 0.1517                   |                              |
| R indices (all data)              | R1 = 0.0840, wR2 = 0.1628                   |                              |
| Largest diff. peak and hole       | 0.286 and -0.258 e.Å <sup>-3</sup>          |                              |

# Crystal data and structure refinement for **4a**

|                                   |                                                               |                               |
|-----------------------------------|---------------------------------------------------------------|-------------------------------|
| Identification code               | 7562                                                          |                               |
| Empirical formula                 | C33 H30 N4 O11                                                |                               |
| Formula weight                    | 658.61                                                        |                               |
| Temperature                       | 223(2) K                                                      |                               |
| Wavelength                        | 0.71073 Å                                                     |                               |
| Crystal system                    | Triclinic                                                     |                               |
| Space group                       | P-1                                                           |                               |
| Unit cell dimensions              | a = 8.0316(10) Å                                              | $\alpha = 109.279(2)^\circ$ . |
|                                   | b = 13.8306(17) Å                                             | $\beta = 93.852(2)^\circ$ .   |
|                                   | c = 15.0009(18) Å                                             | $\gamma = 106.744(2)^\circ$ . |
| Volume                            | 1481.7(3) Å <sup>3</sup>                                      |                               |
| Z                                 | 2                                                             |                               |
| Density (calculated)              | 1.476 Mg/m <sup>3</sup>                                       |                               |
| Absorption coefficient            | 0.113 mm <sup>-1</sup>                                        |                               |
| F(000)                            | 688                                                           |                               |
| Crystal size                      | 0.80 x 0.24 x 0.12 mm <sup>3</sup>                            |                               |
| Theta range for data collection   | 1.46 to 27.49°.                                               |                               |
| Index ranges                      | -10<= <i>h</i> <=10, -17<= <i>k</i> <=17, -19<= <i>l</i> <=19 |                               |
| Reflections collected             | 10240                                                         |                               |
| Independent reflections           | 6769 [R(int) = 0.0303]                                        |                               |
| Completeness to theta = 27.49°    | 99.4 %                                                        |                               |
| Absorption correction             | Sadabs, (Sheldrick 2001)                                      |                               |
| Max. and min. transmission        | 0.9866 and 0.9153                                             |                               |
| Refinement method                 | Full-matrix least-squares on F <sup>2</sup>                   |                               |
| Data / restraints / parameters    | 6769 / 0 / 450                                                |                               |
| Goodness-of-fit on F <sup>2</sup> | 1.002                                                         |                               |
| Final R indices [I>2sigma(I)]     | R1 = 0.0616, wR2 = 0.1287                                     |                               |
| R indices (all data)              | R1 = 0.1030, wR2 = 0.1457                                     |                               |
| Largest diff. peak and hole       | 0.497 and -0.298 e.Å <sup>-3</sup>                            |                               |
